# Supplementary material for: Mapping black panthers: Macroecological modeling of melanism in leopards (Panthera pardus)
Source: PubMed Central journal article supplement (PMC5381760; doi:10.1371/journal.pone.0170378), 2017-04-05
Supplement: pone.0170378.s001.pdf [file pone.0170378.s001.pdf]

S1 Table - Panthera pardus location records used in the present study.

| Id               | Subspecies       | Location                                                  | Deg. - WGS84 |           | Biome                                                        | Ecoregion                                      | Sample     | Analysis | Year    | Source                                     |
|------------------|------------------|-----------------------------------------------------------|--------------|-----------|--------------------------------------------------------------|------------------------------------------------|------------|----------|---------|--------------------------------------------|
|                  |                  |                                                           | Latitude     | Longitude |                                                              |                                                |            |          |         |                                            |
| Doubtful Mel. 01 | <i>saxicolor</i> | Tandoureh National Park, Iran                             | 37.3762      | 58.5006   | Temperate Coniferous Forest                                  | Caucasus-Anatolian-Hyrcanian temperate forests | Report     | All      | no data | Asian Leopard Group                        |
| Doubtful Mel. 02 | <i>pardus</i>    | Chyulu Hills National Park, Kenya                         | -2.8161      | 38.1473   | Tropical and Subtropical Grasslands, Savannas and Shrublands | East African Acacia Savannas                   | Report     | All      | no data | Leon Guardians                             |
| Doubtful Mel. 03 | <i>pardus</i>    | Mount Kenya's, Kenya                                      | -0.3062      | 37.1866   | Tropical and Subtropical Moist Broadleaf Forests             | East African montane forests                   | Report     | All      | no data | Video Mount Kenya/Sunquist & Sunquist 2002 |
| Doubtful Mel. 04 | <i>pardus</i>    | Lydenburg, South Africa                                   | -24.9221     | 30.6565   | Montane Grasslands and Shrublands                            | Drakensberg Montane Woodlands and Grasslands   | Report     | All      | no data | Sharon Hammond                             |
| Doubtful Mel. 05 | <i>saxicolor</i> | Garmsar, Semnan Province, Iran                            | 34.9385      | 52.5348   | Deserts and Xeric Shrublands                                 | Central Persian desert basins                  | Report     | All      | no data | Asian Leopard Group                        |
| Melanistic 01    | <i>fusca</i>     | Manas National Park, Bhutan                               | 26.8011      | 91.0330   | Tropical and Subtropical Moist Broadleaf Forests             | Brahmaputra Valley semi-evergreen forests      | Photograph | All      | no data | Smithsonian Institution                    |
| Melanistic 02    | <i>fusca</i>     | Tsamang, Monggar, Bhutan                                  | 27.5048      | 91.1057   | Temperate Broadleaf and Mixed Forests                        | Eastern Himalayan broadleaf forests            | Photograph | All      | no data | Smithsonian Institution                    |
| Melanistic 03    | <i>fusca</i>     | Southern Lung, China                                      | 28.2364      | 92.7316   | Montane Grasslands and Shrublands                            | Eastern Himalayan alpine shrub and meadows     | Photograph | All      | no data | Smithsonian Institution                    |
| Melanistic 04    | <i>pardus</i>    | Addis Ababa, Abissynya, Ethiopia                          | 9.0445       | 38.6967   | Montane Grasslands and Shrublands                            | Ethiopian montane grasslands and woodlands     | Photograph | Filtered | 1909    | National Museum of Natural History USA     |
| Melanistic 05    | <i>fusca</i>     | Achanakmar Tiger Reserve, India                           | 22.4528      | 81.5555   | Tropical and Subtropical Moist Broadleaf Forests             | Eastern highlands moist deciduous forests      | Report     | All      | no data | Milind Pariwakam/Biswajit Mohanty          |
| Melanistic 06    | <i>fusca</i>     | Achanakmar Tiger Reserve, India                           | 22.5980      | 81.8327   | Tropical and Subtropical Moist Broadleaf Forests             | Eastern highlands moist deciduous forests      | Photograph | All      | no data | Milind Pariwakam/Biswajit Mohanty          |
| Melanistic 07    | <i>fusca</i>     | Achanakmar Tiger Reserve, India                           | 22.3421      | 81.8245   | Tropical and Subtropical Moist Broadleaf Forests             | Eastern highlands moist deciduous forests      | Report     | All      | no data | Milind Pariwakam/Biswajit Mohanty          |
| Melanistic 08    | <i>fusca</i>     | Bhadra Tiger Reserve, India                               | 13.4910      | 75.6496   | Tropical and Subtropical Moist Broadleaf Forests             | North Western Ghats moist deciduous forests    | Photograph | All      | 2012    | Conservation India                         |
| Melanistic 09    | <i>fusca</i>     | Bhadra Tiger Reserve, India                               | 13.6189      | 75.6286   | Tropical and Subtropical Moist Broadleaf Forests             | North Western Ghats moist deciduous forests    | Photograph | All      | 2012    | Conservation India                         |
| Melanistic 10    | <i>fusca</i>     | Chhattisgarh, India                                       | 23.9813      | 82.0120   | Tropical and Subtropical Dry Broadleaf Forests               | Narmada Valley dry deciduous forests           | Report     | All      | no data | Milind Pariwakam/Biswajit Mohanty          |
| Melanistic 11    | <i>fusca</i>     | Dandeli-Anshi Tiger Reserve, India                        | 13.1213      | 75.0433   | Tropical and Subtropical Moist Broadleaf Forests             | Malabar Coast moist forests                    | Photograph | All      | 2013    | Wildlife Conservation Society              |
| Melanistic 12    | <i>fusca</i>     | Dibrugarh, India                                          | 27.4848      | 95.0622   | Tropical and Subtropical Moist Broadleaf Forests             | Brahmaputra Valley semi-evergreen forests      | Photograph | All      | no data | Kashmira Kakati                            |
| Melanistic 13    | <i>fusca</i>     | Kaziranga National Park, India                            | 26.6911      | 93.4945   | Tropical and Subtropical Moist Broadleaf Forests             | Brahmaputra Valley semi-evergreen forests      | Photograph | All      | no data | World Wild Fund                            |
| Melanistic 14    | <i>fusca</i>     | Maijan Bungalow Brahmaputra Ghat, India                   | 27.5008      | 94.9323   | Tropical and Subtropical Moist Broadleaf Forests             | Brahmaputra Valley semi-evergreen forests      | Photograph | All      | no data | Kashmira Kakati                            |
| Melanistic 15    | <i>fusca</i>     | Mudumalai National Park, Central India, India             | 11.5087      | 76.5651   | Tropical and Subtropical Moist Broadleaf Forests             | South Western Ghats moist deciduous forests    | Photograph | All      | 2013    | Phillip Ross                               |
| Melanistic 16    | <i>fusca</i>     | Orissa, India                                             | 20.3555      | 80.9707   | Tropical and Subtropical Moist Broadleaf Forests             | Eastern highlands moist deciduous forests      | Report     | All      | no data | Milind Pariwakam/Biswajit Mohanty          |
| Melanistic 17    | <i>fusca</i>     | Pakke Tiger Reserve in Arunachal Pradesh, India           | 28.5669      | 95.9691   | Temperate Broadleaf and Mixed Forests                        | Eastern Himalayan broadleaf forests            | Photograph | All      | 2013    | Milind Pariwakam/Biswajit Mohanty          |
| Melanistic 18    | <i>fusca</i>     | Pakke Tiger Reserve in Arunachal Pradesh, India           | 28.6604      | 95.6358   | Temperate Broadleaf and Mixed Forests                        | Eastern Himalayan broadleaf forests            | Photograph | All      | no data | Milind Pariwakam/Biswajit Mohanty          |
| Melanistic 19    | <i>fusca</i>     | Periyar Wildlife Sanctuary, India                         | 9.2756       | 76.9211   | Tropical and Subtropical Moist Broadleaf Forests             | South Western Ghats moist deciduous forests    | Report     | All      | no data | Milind Pariwakam/Biswajit Mohanty          |
| Melanistic 20    | <i>melas</i>     | Baluran National Park, Java, Indonesia                    | -7.8531      | 114.4085  | Tropical and Subtropical Moist Broadleaf Forests             | Eastern Java-Bali rain forests                 | Photograph | All      | 2012    | Copenhagen Zoo                             |
| Melanistic 21    | <i>melas</i>     | Gunung Gede Pangrango National Park, West Java, Indonesia | -6.8038      | 106.9310  | Tropical and Subtropical Moist Broadleaf Forests             | Western Java montane rain forests              | Photograph | All      | no data | Anton Ario                                 |
| Melanistic 22    | <i>melas</i>     | Gunung Salak National Park, Java, Indonesia               | -7.1238      | 107.3197  | Tropical and Subtropical Moist Broadleaf Forests             | Western Java montane rain forests              | Photograph | All      | no data | CIFOR                                      |
| Melanistic 23    | <i>melas</i>     | Halimun-Salak, Java, Indonesia                            | -6.7671      | 106.5601  | Tropical and Subtropical Moist Broadleaf Forests             | Western Java montane rain forests              | Photograph | All      | 2004    | Anhar Harahap                              |
| Melanistic 24    | <i>melas</i>     | Halimun-Salak, Java, Indonesia                            | -6.7832      | 106.6828  | Tropical and Subtropical Moist Broadleaf Forests             | Western Java montane rain forests              | Photograph | All      | 2005    | Anhar Harahap                              |
| Melanistic 25    | <i>melas</i>     | Ujung Kulon National Park, Java, Indonesia                | -6.7524      | 105.3290  | Tropical and Subtropical Moist Broadleaf Forests             | Western Java rain forests                      | Photograph | All      | no data | World Wild Fund                            |
| Melanistic 26    | <i>melas</i>     | Western Java, Indonesia                                   | -6.6280      | 105.9386  | Tropical and Subtropical Moist Broadleaf Forests             | Western Java rain forests                      | Photograph | Filtered | 1907    | National Museum of Natural History USA     |
| Melanistic 27    | <i>delacouri</i> | Kenyir Wildlife Corridor, Malaysia                        | 5.2801       | 102.6407  | Tropical and Subtropical Moist Broadleaf Forests             | Peninsular Malaysian rain forests              | Photograph | All      | 2012    | Reuben Clements                            |
| Melanistic 28    | <i>delacouri</i> | Kenyir Wildlife Corridor, Malaysia                        | 5.1205       | 102.9918  | Tropical and Subtropical Moist Broadleaf Forests             | Peninsular Malaysian rain forests              | Photograph | All      | no data | Kenyir Wildlife Corridor Leopard Project   |
| Melanistic 29    | <i>delacouri</i> | Kenyir Wildlife Corridor, Malaysia                        | 5.2390       | 102.7215  | Tropical and Subtropical Moist Broadleaf Forests             | Peninsular Malaysian rain forests              | Photograph | All      | 2011    | Kae Kawanishi                              |
| Melanistic 30    | <i>delacouri</i> | Malay Peninsula, Malaysia                                 | 3.3657       | 102.1930  | Tropical and Subtropical Moist Broadleaf Forests             | Peninsular Malaysian rain forests              | Photograph | All      | 2009    | Kae Kawanishi                              |
| Melanistic 31    | <i>delacouri</i> | Malay Peninsula, Malaysia                                 | 4.4303       | 103.1427  | Tropical and Subtropical Moist Broadleaf Forests             | Peninsular Malaysian rain forests              | Photograph | All      | 2009    | Kae Kawanishi                              |
| Melanistic 32    | <i>delacouri</i> | Malay Peninsula, Malaysia                                 | 4.4536       | 102.5160  | Tropical and Subtropical Moist Broadleaf Forests             | Peninsular Malaysian rain forests              | Photograph | All      | 2009    | Kae Kawanishi                              |
| Melanistic 33    | <i>delacouri</i> | Malay Peninsula, Malaysia                                 | 4.2904       | 102.3561  | Tropical and Subtropical Moist Broadleaf Forests             | Peninsular Malaysian rain forests              | Photograph | All      | 2009    | Kae Kawanishi                              |
| Melanistic 34    | <i>delacouri</i> | Malay Peninsula, Malaysia                                 | 4.0748       | 102.8376  | Tropical and Subtropical Moist Broadleaf Forests             | Peninsular Malaysian rain forests              | Photograph | All      | 2009    | Kae Kawanishi                              |
| Melanistic 35    | <i>delacouri</i> | Malay Peninsula, Malaysia                                 | 4.1564       | 102.5324  | Tropical and Subtropical Moist Broadleaf Forests             | Peninsular Malaysian rain forests              | Photograph | All      | 2009    | Kae Kawanishi                              |
| Melanistic 36    | <i>delacouri</i> | Malay Peninsula, Malaysia                                 | 4.2963       | 102.7504  | Tropical and Subtropical Moist Broadleaf Forests             | Peninsular Malaysian rain forests              | Photograph | All      | 2009    | Kae Kawanishi                              |
| Melanistic 37    | <i>delacouri</i> | Malay Peninsula, Malaysia                                 | 5.4888       | 102.1140  | Tropical and Subtropical Moist Broadleaf Forests             | Peninsular Malaysian rain forests              | Photograph | All      | 2009    | Kae Kawanishi                              |
| Melanistic 38    | <i>delacouri</i> | Malay Peninsula, Malaysia                                 | 5.7067       | 101.9804  | Tropical and Subtropical Moist Broadleaf Forests             | Peninsular Malaysian rain forests              | Photograph | All      | 2009    | Kae Kawanishi                              |
| Melanistic 39    | <i>delacouri</i> | Malay Peninsula, Malaysia                                 | 5.4091       | 101.6545  | Tropical and Subtropical Moist Broadleaf Forests             | Peninsular Malaysian rain forests              | Photograph | All      | 2009    | Kae Kawanishi                              |
| Melanistic 40    | <i>delacouri</i> | Malay Peninsula, Malaysia                                 | 5.6240       | 101.7890  | Tropical and Subtropical Moist Broadleaf Forests             | Peninsular Malaysian rain forests              | Photograph | All      | 2009    | Kae Kawanishi                              |
| Melanistic 41    | <i>delacouri</i> | Malay Peninsula, Malaysia                                 | 5.7618       | 101.5769  | Tropical and Subtropical Moist Broadleaf Forests             | Peninsular Malaysian rain forests              | Photograph | All      | 2009    | Kae Kawanishi                              |
| Melanistic 42    | <i>delacouri</i> | Malay Peninsula, Thailand                                 | 12.8965      | 99.3874   | Tropical and Subtropical Moist Broadleaf Forests             | Kayah-Karen/Tenasserim moist forests           | Photograph | All      | 2009    | Kae Kawanishi                              |
| Melanistic 43    | <i>delacouri</i> | Malay Peninsula, Thailand                                 | 13.1375      | 99.2334   | Tropical and Subtropical Moist Broadleaf Forests             | Kayah-Karen/Tenasserim moist forests           | Photograph | All      | 2009    | Kae Kawanishi                              |
| Melanistic 44    | <i>delacouri</i> | Malay Peninsula, Malaysia                                 | 6.1715       | 101.0211  | Tropical and Subtropical Moist Broadleaf Forests             | Peninsular Malaysian rain forests              | Photograph | All      | no data | American Museum of Natural History USA     |
| Melanistic 45    | <i>delacouri</i> | Taman Negara Park, Malaysia                               | 5.2790       | 102.4918  | Tropical and Subtropical Moist Broadleaf Forests             | Peninsular Malaysian rain forests              | Photograph | All      | 2010    | Kae Kawanishi                              |
| Melanistic 46    | <i>fusca</i>     | Kangchenjunga Conservation Area, Nepal                    | 27.7408      | 87.9714   | Montane Grasslands and Shrublands                            | Eastern Himalayan alpine meadows               | Photograph | All      | 2013    | Thapa et al 2013                           |
| Melanistic 47    | <i>kotiyva</i>   | Deniyaya, Sri Lanka                                       | 6.7561       | 80.6977   | Tropical and Subtropical Moist Broadleaf Forests             | Sri Lankan moist forest                        | Photograph | All      | no data | Andrew Kittle                              |
| Melanistic 48    | <i>delacouri</i> | Ban Krang, Thailand                                       | 16.7477      | 100.2027  | Tropical and Subtropical Moist Broadleaf Forests             | Chao Phraya freshwater swamp forests           | Photograph | All      | no data | American Museum of Natural History USA     |
| Melanistic 49    | <i>delacouri</i> | Chiang Mai, Thailand                                      | 18.7627      | 98.8565   | Tropical and Subtropical Moist Broadleaf Forests             | Kayah-Karen/Tenasserim moist forests           | Photograph | All      | 2013    | Bruce Kekule                               |
| Melanistic 50    | <i>delacouri</i> | Huai Kha Khaeng Wildlife Sanctuary, Thailand              | 15.6539      | 99.5247   | Tropical and Subtropical Dry Broadleaf Forests               | Indochina dry forests                          | Photograph | All      | 2009    | Bruce Kekule                               |
| Melanistic 51    | <i>delacouri</i> | Huai Kha Khaeng Wildlife Sanctuary, Thailand              | 15.1661      | 99.2784   | Tropical and Subtropical Dry Broadleaf Forests               | Kayah-Karen/Tenasserim moist forests           | Photograph | All      | 2013    | Bruce Kekule                               |
| Melanistic 52    | <i>delacouri</i> | Huai Kha Khaeng Wildlife Sanctuary, Thailand              | 15.6986      | 98.7621   | Tropical and Subtropical Moist Broadleaf Forests             | Kayah-Karen/Tenasserim moist forests           | Photograph | All      | no data | Kae Kawanishi                              |
| Melanistic 53    | <i>delacouri</i> | Huai Kha Khaeng Wildlife Sanctuary, Thailand              | 15.5612      | 98.9229   | Tropical and Subtropical Moist Broadleaf Forests             | Kayah-Karen/Tenasserim moist forests           | Photograph | All      | 2013    | Bruce Kekule                               |
| Melanistic 54    | <i>delacouri</i> | Huai Kha Khaeng Wildlife Sanctuary, Thailand              | 15.0417      | 98.3983   | Tropical and Subtropical Moist Broadleaf Forests             | Chao Phraya lowland moist deciduous forests    | Photograph | All      | 2012    | Wildlife Conservation Society              |
| Melanistic 55    | <i>delacouri</i> | Huai Kha Khaeng Wildlife Sanctuary, Thailand              | 14.4518      | 98.8936   | Tropical and Subtropical Moist Broadleaf Forests             | Chao Phraya lowland moist deciduous forests    | Photograph | All      | 2012    | Wildlife Conservation Society              |
| Melanistic 56    | <i>delacouri</i> | Huai Kha Khaeng Wildlife Sanctuary, Thailand              | 15.3042      | 99.2820   | Tropical and Subtropical Moist Broadleaf Forests             | Kayah-Karen/Tenasserim moist forests           | Photograph | All      | 2013    | Wildlife Conservation Society              |

| Id                | Subspecies        | Location                                          | Deg. - WGS84 |           | Biome                                                        | Ecoregion                                      | Sample     | Analysis | Year    | Source                                       |
|-------------------|-------------------|---------------------------------------------------|--------------|-----------|--------------------------------------------------------------|------------------------------------------------|------------|----------|---------|----------------------------------------------|
|                   |                   |                                                   | Latitude     | Longitude |                                                              |                                                |            |          |         |                                              |
| Melanistic 57     | <i>delacouri</i>  | Huai Kha Khaeng Wildlife Sanctuary, Thailand      | 15.1038      | 99.1074   | Tropical and Subtropical Moist Broadleaf Forests             | Kayah-Karen/Tenasserim moist forests           | Photograph | All      | 2013    | Wildlife Conservation Society                |
| Melanistic 58     | <i>delacouri</i>  | Huai Kha Khaeng Wildlife Sanctuary, Thailand      | 15.1941      | 98.9874   | Tropical and Subtropical Moist Broadleaf Forests             | Kayah-Karen/Tenasserim moist forests           | Photograph | All      | 2013    | Wildlife Conservation Society                |
| Melanistic 59     | <i>delacouri</i>  | Kaeng Krachan National Park, Thailand             | 13.0750      | 99.5457   | Tropical and Subtropical Moist Broadleaf Forests             | Kayah-Karen/Tenasserim moist forests           | Photograph | All      | 2009    | Bruce Kekule                                 |
| Melanistic 60     | <i>delacouri</i>  | Kaeng Krachan National Park, Thailand             | 13.1241      | 99.4217   | Tropical and Subtropical Moist Broadleaf Forests             | Kayah-Karen/Tenasserim moist forests           | Photograph | All      | 2009    | Bruce Kekule                                 |
| Melanistic 61     | <i>delacouri</i>  | Kaeng Krachan National Park, Thailand             | 13.0125      | 99.2634   | Tropical and Subtropical Moist Broadleaf Forests             | Kayah-Karen/Tenasserim moist forests           | Photograph | All      | 2009    | Bruce Kekule                                 |
| Melanistic 62     | <i>delacouri</i>  | Khao Sok National Park, Thailand                  | 8.9317       | 98.5110   | Tropical and Subtropical Moist Broadleaf Forests             | Kayah-Karen/Tenasserim moist forests           | Photograph | All      | no data | Wildlife Conservation Society                |
| Melanistic 63     | <i>delacouri</i>  | Kuiburi National Park, Thailand                   | 12.3004      | 99.5971   | Tropical and Subtropical Moist Broadleaf Forests             | Kayah-Karen/Tenasserim moist forests           | Photograph | All      | no data | Kae Kawanishi                                |
| Melanistic 64     | <i>delacouri</i>  | Malay Peninsula, Thailand                         | 8.5951       | 98.4122   | Tropical and Subtropical Moist Broadleaf Forests             | Kayah-Karen/Tenasserim moist forests           | Photograph | All      | 2009    | Kae Kawanishi                                |
| Melanistic 65     | <i>delacouri</i>  | Malay Peninsula, Malaysia                         | 3.2732       | 102.3561  | Tropical and Subtropical Moist Broadleaf Forests             | Peninsular Malaysian rain forests              | Photograph | All      | 2009    | Kae Kawanishi                                |
| Melanistic 66     | <i>delacouri</i>  | Ban Krang, Thailand                               | 12.9953      | 99.3327   | Tropical and Subtropical Moist Broadleaf Forests             | Kayah-Karen/Tenasserim moist forests           | Photograph | All      | 2013    | Bruce Kekule                                 |
| Melanistic 67     | <i>delacouri</i>  | Kenyir Wildlife Corridor, Malaysia                | 4.7589       | 102.8283  | Tropical and Subtropical Moist Broadleaf Forests             | Peninsular Malaysian rain forests              | Photograph | All      | 2013    | International Society of Zoological Sciences |
| Non-melanistic 01 | <i>fusca</i>      | Afghanistan Central Highlands, Afghanistan        | 35.4703      | 70.7899   | Montane Grasslands and Shrublands                            | Middle Asian montane woodlands and steppe      | Photograph | All      | 2011    | Wildlife Conservation Society                |
| Non-melanistic 02 | <i>pardus</i>     | Chitau, Bie, Angola                               | -12.9522     | 22.6538   | Tropical and Subtropical Grasslands, Savannas and Shrublands | Angolan Miombo woodlands                       | Photograph | Filtered | 1925    | American Museum of Natural History USA       |
| Non-melanistic 03 | <i>pardus</i>     | Chitau, Bie, Angola                               | -12.9522     | 22.6538   | Tropical and Subtropical Grasslands, Savannas and Shrublands | Angolan Miombo woodlands                       | Photograph | Filtered | 1925    | American Museum of Natural History USA       |
| Non-melanistic 04 | <i>pardus</i>     | Chitau, Bie, Angola                               | -12.9522     | 22.6538   | Tropical and Subtropical Grasslands, Savannas and Shrublands | Angolan Miombo woodlands                       | Photograph | Filtered | 1925    | American Museum of Natural History USA       |
| Non-melanistic 05 | <i>pardus</i>     | Chitau, Bie, Angola                               | -12.7876     | 22.6620   | Tropical and Subtropical Grasslands, Savannas and Shrublands | Angolan Miombo woodlands                       | Photograph | Filtered | 1925    | American Museum of Natural History USA       |
| Non-melanistic 06 | <i>pardus</i>     | Chitau, Bie, Angola                               | -12.7876     | 22.6620   | Tropical and Subtropical Grasslands, Savannas and Shrublands | Angolan Miombo woodlands                       | Photograph | Filtered | 1925    | American Museum of Natural History USA       |
| Non-melanistic 07 | <i>saxicolor</i>  | Zanguezur State Sanctuary, Armenia                | 39.0436      | 46.4373   | Temperate Broadleaf and Mixed Forests                        | Caucasus-Anatolian-Hyrcanian temperate forests | Photograph | All      | no data | Thomas Gray                                  |
| Non-melanistic 08 | <i>fusca</i>      | Manas National Park, Bhutan                       | 26.8923      | 91.0124   | Tropical and Subtropical Moist Broadleaf Forests             | Himalayan subtropical broadleaf forests        | Photograph | All      | no data | Smithsonian Institution                      |
| Non-melanistic 09 | <i>fusca</i>      | Manas National Park, Bhutan                       | 26.8480      | 91.1996   | Tropical and Subtropical Moist Broadleaf Forests             | Himalayan subtropical broadleaf forests        | Photograph | All      | no data | Smithsonian Institution                      |
| Non-melanistic 10 | <i>fusca</i>      | Manas National Park, Bhutan                       | 26.8270      | 91.1957   | Tropical and Subtropical Moist Broadleaf Forests             | Himalayan subtropical broadleaf forests        | Photograph | All      | no data | Smithsonian Institution                      |
| Non-melanistic 11 | <i>pardus</i>     | Central Kalahari Reserve, Botswana                | -23.1392     | 24.1780   | Deserts and Xeric Shrublands                                 | Kalahari xeric savanna                         | Photograph | All      | no data | Andrew Stein                                 |
| Non-melanistic 12 | <i>pardus</i>     | Central Kalahari Reserve, Botswana                | -23.1096     | 24.0939   | Deserts and Xeric Shrublands                                 | Kalahari xeric savanna                         | Photograph | All      | no data | Andrew Stein                                 |
| Non-melanistic 13 | <i>pardus</i>     | Central Kalahari Reserve, Botswana                | -22.1384     | 23.7266   | Deserts and Xeric Shrublands                                 | Kalahari xeric savanna                         | Photograph | All      | no data | Andrew Stein                                 |
| Non-melanistic 14 | <i>pardus</i>     | Central Kalahari Reserve, Botswana                | -21.7793     | 23.2238   | Tropical and Subtropical Grasslands, Savannas and Shrublands | Kalahari Acacia-Baikiaea woodlands             | Photograph | All      | no data | Andrew Stein                                 |
| Non-melanistic 15 | <i>pardus</i>     | Central Kalahari Reserve, Botswana                | -21.5270     | 24.1481   | Tropical and Subtropical Grasslands, Savannas and Shrublands | Kalahari Acacia-Baikiaea woodlands             | Photograph | All      | no data | Andrew Stein                                 |
| Non-melanistic 16 | <i>pardus</i>     | Central Kalahari Reserve, Botswana                | -21.2204     | 23.3095   | Tropical and Subtropical Grasslands, Savannas and Shrublands | Kalahari Acacia-Baikiaea woodlands             | Photograph | All      | no data | Andrew Stein                                 |
| Non-melanistic 17 | <i>pardus</i>     | Chobe National Park, Botswana                     | -18.8340     | 24.1883   | Tropical and Subtropical Grasslands, Savannas and Shrublands | Zambeian and Mopane woodlands                  | Photograph | All      | no data | Andrew Stein                                 |
| Non-melanistic 18 | <i>pardus</i>     | Chobe National Park, Botswana                     | -18.5234     | 24.4231   | Tropical and Subtropical Grasslands, Savannas and Shrublands | Zambeian Baikiaea woodlands                    | Photograph | All      | no data | Andrew Stein                                 |
| Non-melanistic 19 | <i>pardus</i>     | Chobe National Park, Botswana                     | -18.2749     | 24.4725   | Tropical and Subtropical Grasslands, Savannas and Shrublands | Zambeian Baikiaea woodlands                    | Photograph | All      | no data | Andrew Stein                                 |
| Non-melanistic 20 | <i>pardus</i>     | Ghanzi, Botswana                                  | -21.5383     | 21.5976   | Tropical and Subtropical Grasslands, Savannas and Shrublands | Kalahari Acacia-Baikiaea woodlands             | Photograph | All      | no data | Andrew Stein                                 |
| Non-melanistic 21 | <i>pardus</i>     | Kgalagadi Transfrontier Park, Botswana            | -25.5575     | 20.7679   | Deserts and Xeric Shrublands                                 | Kalahari xeric savanna                         | Photograph | All      | no data | Andrew Stein                                 |
| Non-melanistic 22 | <i>pardus</i>     | Kgalagadi Transfrontier Park, Botswana            | -24.9999     | 21.1966   | Deserts and Xeric Shrublands                                 | Kalahari xeric savanna                         | Photograph | All      | no data | Andrew Stein                                 |
| Non-melanistic 23 | <i>pardus</i>     | Kgalagadi Transfrontier Park, Botswana            | -24.5926     | 20.3313   | Deserts and Xeric Shrublands                                 | Kalahari xeric savanna                         | Photograph | All      | no data | Andrew Stein                                 |
| Non-melanistic 24 | <i>pardus</i>     | Kgalagadi Transfrontier Park, Botswana            | -24.5773     | 20.3227   | Deserts and Xeric Shrublands                                 | Kalahari xeric savanna                         | Photograph | All      | no data | Andrew Stein                                 |
| Non-melanistic 25 | <i>pardus</i>     | Okavango Delta, Botswana                          | -18.3912     | 23.2474   | Tropical and Subtropical Grasslands, Savannas and Shrublands | Zambeian Baikiaea woodlands                    | Photograph | All      | no data | Andrew Stein                                 |
| Non-melanistic 26 | <i>pardus</i>     | Tsao, Botswana                                    | -20.4123     | 21.4723   | Tropical and Subtropical Grasslands, Savannas and Shrublands | Kalahari Acacia-Baikiaea woodlands             | Photograph | All      | 2009    | Andrew Stein                                 |
| Non-melanistic 27 | <i>pardus</i>     | Tsao, Botswana                                    | -20.4123     | 21.4723   | Tropical and Subtropical Grasslands, Savannas and Shrublands | Kalahari Acacia-Baikiaea woodlands             | Photograph | All      | 2009    | Andrew Stein                                 |
| Non-melanistic 28 | <i>pardus</i>     | Tsao, Botswana                                    | -20.4123     | 21.4723   | Tropical and Subtropical Grasslands, Savannas and Shrublands | Kalahari Acacia-Baikiaea woodlands             | Photograph | All      | 2009    | Andrew Stein                                 |
| Non-melanistic 29 | <i>pardus</i>     | Tuli Reserve, Botswana                            | -21.9139     | 28.9188   | Tropical and Subtropical Grasslands, Savannas and Shrublands | Zambeian and Mopane woodlands                  | Photograph | All      | no data | Andrew Stein                                 |
| Non-melanistic 30 | <i>delacouri</i>  | Mondulkiri, Cambodia                              | 12.4594      | 107.3662  | Tropical and Subtropical Dry Broadleaf Forests               | Southeastern Indochina dry evergreen forests   | Photograph | All      | 2009    | Bruce Kekule                                 |
| Non-melanistic 31 | <i>delacouri</i>  | Mondulkiri Eastern Plains, Cambodia               | 12.5022      | 107.5279  | Tropical and Subtropical Dry Broadleaf Forests               | Southeastern Indochina dry evergreen forests   | Photograph | All      | 2009    | Bruce Kekule                                 |
| Non-melanistic 32 | <i>delacouri</i>  | Mondulkiri Protected Forest, Cambodia             | 12.7827      | 106.9304  | Tropical and Subtropical Dry Broadleaf Forests               | Central Indochina dry forests                  | Photograph | All      | no data | Bruce Kekule                                 |
| Non-melanistic 33 | <i>delacouri</i>  | Srepok Wilderness Area, Cambodia                  | 13.0865      | 107.3496  | Tropical and Subtropical Dry Broadleaf Forests               | Central Indochina dry forests                  | Photograph | All      | no data | Bruce Kekule                                 |
| Non-melanistic 34 | <i>pardus</i>     | Meuban, Cameroon                                  | 2.4069       | 12.6924   | Tropical and Subtropical Moist Broadleaf Forests             | Northwestern Congolian lowland forests         | Photograph | Filtered | 1935    | American Museum of Natural History USA       |
| Non-melanistic 35 | <i>pardus</i>     | Ngoundi, Cameroon                                 | 3.8528       | 15.1198   | Tropical and Subtropical Moist Broadleaf Forests             | Northwestern Congolian lowland forests         | Photograph | Filtered | 1935    | American Museum of Natural History USA       |
| Non-melanistic 36 | <i>orientalis</i> | Duhuangzi, China                                  | 43.3754      | 130.8418  | Temperate Broadleaf and Mixed Forests                        | Manchurian mixed forests                       | Photograph | All      | 2011    | Shu Jin Luo                                  |
| Non-melanistic 37 | <i>japonensis</i> | Fu Tan, Yen Ching Kao, Szechuan, China            | 31.1713      | 103.6034  | Temperate Coniferous Forest                                  | Hengduan Shan conifer forests                  | Photograph | Filtered | 1922    | American Museum of Natural History USA       |
| Non-melanistic 38 | <i>japonensis</i> | Fujian, China                                     | 26.1299      | 119.3211  | Tropical and Subtropical Moist Broadleaf Forests             | Southeast China-Hainan moist forests           | Photograph | Filtered | 1925    | American Museum of Natural History USA       |
| Non-melanistic 39 | <i>japonensis</i> | Fuqing, Fujian, China                             | 25.7475      | 119.3734  | Tropical and Subtropical Moist Broadleaf Forests             | Southeast China-Hainan moist forests           | Photograph | Filtered | 1916    | American Museum of Natural History USA       |
| Non-melanistic 40 | <i>japonensis</i> | Futsing, Fukien Province, China                   | 26.4773      | 119.2144  | Tropical and Subtropical Moist Broadleaf Forests             | Southeast China-Hainan moist forests           | Photograph | All      | no data | American Museum of Natural History USA       |
| Non-melanistic 41 | <i>orientalis</i> | Hunchun Amur Tiger National Nature Reserve, China | 43.1131      | 130.5932  | Temperate Broadleaf and Mixed Forests                        | Manchurian mixed forests                       | Photograph | All      | 2012    | Wildlife Conservation Society                |
| Non-melanistic 42 | <i>orientalis</i> | Hunchun Amur Tiger National Nature Reserve, China | 43.1737      | 130.6676  | Temperate Broadleaf and Mixed Forests                        | Manchurian mixed forests                       | Photograph | All      | 2012    | Wildlife Conservation Society                |
| Non-melanistic 43 | <i>japonensis</i> | Kuan Shien, Sichuan, China                        | 28.5850      | 111.8209  | Temperate Broadleaf and Mixed Forests                        | Changjiang Plain evergreen forests             | Photograph | Filtered | 1932    | National Museum of Natural History USA       |
| Non-melanistic 44 | <i>fusca</i>      | Lung, China                                       | 31.0137      | 93.1163   | Montane Grasslands and Shrublands                            | Southeast Tibet shrublands and meadows         | Photograph | Filtered | 1948    | American Museum of Natural History USA       |
| Non-melanistic 45 | <i>fusca</i>      | Mengmang, China                                   | 30.7464      | 93.1432   | Montane Grasslands and Shrublands                            | Southeast Tibet shrublands and meadows         | Photograph | All      | no data | American Museum of Natural History USA       |
| Non-melanistic 46 | <i>orientalis</i> | Mijang, China                                     | 43.1356      | 130.2399  | Temperate Broadleaf and Mixed Forests                        | Manchurian mixed forests                       | Photograph | All      | 2013    | Wildlife Conservation Society                |
| Non-melanistic 47 | <i>japonensis</i> | Minchou, Gansu, China                             | 26.2164      | 119.0907  | Tropical and Subtropical Moist Broadleaf Forests             | Southeast China-Hainan moist forests           | Photograph | Filtered | 1911    | National Museum of Natural History USA       |
| Non-melanistic 48 | <i>japonensis</i> | Nanping, Fujian Province, China                   | 26.6246      | 118.1872  | Tropical and Subtropical Moist Broadleaf Forests             | Southeast China-Hainan moist forests           | Photograph | Filtered | 1920    | American Museum of Natural History USA       |
| Non-melanistic 49 | <i>japonensis</i> | Shansi, Hezhou, China                             | 23.9024      | 111.7892  | Tropical and Subtropical Moist Broadleaf Forests             | Southeast China-Hainan moist forests           | Photograph | All      | no data | Asian Leopard Project                        |
| Non-melanistic 50 | <i>japonensis</i> | Shanxi Province, China                            | 37.8071      | 114.2488  | Temperate Broadleaf and Mixed Forests                        | Central China loess plateau mixed forests      | Photograph | All      | no data | Asian Leopard Project                        |
| Non-melanistic 51 | <i>japonensis</i> | Shanxi Province, China                            | 37.5338      | 114.0875  | Temperate Broadleaf and Mixed Forests                        | Central China loess plateau mixed forests      | Photograph | All      | no data | Asian Leopard Project                        |

| Id                 | Subspecies        | Location                                          | Deg. - WGS84 |           | Biome                                                        | Ecoregion                                     | Sample     | Analysis | Year    | Source                                 |
|--------------------|-------------------|---------------------------------------------------|--------------|-----------|--------------------------------------------------------------|-----------------------------------------------|------------|----------|---------|----------------------------------------|
|                    |                   |                                                   | Latitude     | Longitude |                                                              |                                               |            |          |         |                                        |
| Non-melanistic 52  | <i>fusca</i>      | Sichuan, China                                    | 33.2854      | 98.7018   | Montane Grasslands and Shrublands                            | Southeast Tibet shrublands and meadows        | Photograph | All      | 2008    | Smithsonian Institution                |
| Non-melanistic 53  | <i>japonensis</i> | Suifu, Tseo-Jia-Keo, Sichuan, China               | 28.7546      | 104.7215  | Temperate Broadleaf and Mixed Forests                        | Sichuan Basin evergreen broadleaf forests     | Photograph | Filtered | 1927    | National Museum of Natural History USA |
| Non-melanistic 54  | <i>japonensis</i> | Suifu, Tseo-Jia-Keo, Sichuan, China               | 28.6382      | 104.7183  | Temperate Broadleaf and Mixed Forests                        | Sichuan Basin evergreen broadleaf forests     | Photograph | Filtered | 1929    | National Museum of Natural History USA |
| Non-melanistic 55  | <i>japonensis</i> | Suifu, Tseo-Jia-Keo, Sichuan, China               | 28.7636      | 104.7596  | Temperate Broadleaf and Mixed Forests                        | Sichuan Basin evergreen broadleaf forests     | Photograph | Filtered | 1929    | National Museum of Natural History USA |
| Non-melanistic 56  | <i>japonensis</i> | Tai-Yuan-Fu, Shanxi, China                        | 38.0998      | 113.3001  | Temperate Broadleaf and Mixed Forests                        | Central China loess plateau mixed forests     | Photograph | Filtered | 1910    | National Museum of Natural History USA |
| Non-melanistic 57  | <i>japonensis</i> | Tashenlu, Sichuan, China                          | 29.5977      | 111.9222  | Tropical and Subtropical Moist Broadleaf Forests             | Guizhou Plateau broadleaf and mixed forests   | Photograph | Filtered | 1930    | National Museum of Natural History USA |
| Non-melanistic 58  | <i>japonensis</i> | Tseo-Jia-Keo, Sichuan, China                      | 29.1496      | 112.2255  | Temperate Broadleaf and Mixed Forests                        | Changjiang Plain evergreen forests            | Photograph | Filtered | 1931    | National Museum of Natural History USA |
| Non-melanistic 59  | <i>japonensis</i> | Wen Chuan, Sichuan, China                         | 31.4709      | 103.5986  | Temperate Coniferous Forest                                  | Hengduan Shan conifer forests                 | Photograph | All      | no data | National Museum of Natural History USA |
| Non-melanistic 60  | <i>japonensis</i> | Yeping, Fukien Province, China                    | 26.5698      | 118.5703  | Tropical and Subtropical Moist Broadleaf Forests             | Southeast China-Hainan moist forests          | Photograph | All      | 1921    | American Museum of Natural History USA |
| Non-melanistic 61  | <i>japonensis</i> | Yochow, Hunan, China                              | 28.1421      | 112.8030  | Temperate Broadleaf and Mixed Forests                        | Changjiang Plain evergreen forests            | Photograph | All      | no data | National Museum of Natural History USA |
| Non-melanistic 62  | <i>delacouri</i>  | Yuman National Nature Reserve, China              | 22.1923      | 101.3011  | Tropical and Subtropical Moist Broadleaf Forests             | North Indochina subtropical moist forests     | Photograph | All      | 2008    | Jutzeler et al 2010                    |
| Non-melanistic 63  | <i>pardus</i>     | Akenge, Congo                                     | 2.8334       | 27.1776   | Tropical and Subtropical Moist Broadleaf Forests             | Northeastern Congo Basin moist forests        | Photograph | Filtered | 1913    | American Museum of Natural History USA |
| Non-melanistic 64  | <i>pardus</i>     | Akenge, Congo                                     | 2.8724       | 27.2210   | Tropical and Subtropical Moist Broadleaf Forests             | Northeastern Congo Basin moist forests        | Photograph | Filtered | 1913    | American Museum of Natural History USA |
| Non-melanistic 65  | <i>pardus</i>     | Bwera, Congo                                      | -0.8704      | 29.3107   | Tropical and Subtropical Grasslands, Savannas and Shrublands | Victoria Basin forest-savanna mosaic          | Photograph | All      | 2012    | National Geographic Society            |
| Non-melanistic 66  | <i>pardus</i>     | Congo River, Ngabe, Congo                         | -3.0253      | 16.1324   | Tropical and Subtropical Grasslands, Savannas and Shrublands | Western Congolian forest-savanna mosaic       | Photograph | All      | no data | Philipp Henschel                       |
| Non-melanistic 67  | <i>pardus</i>     | Nouabalé-Ndoki National Park, Congo               | 2.4665       | 16.5519   | Tropical and Subtropical Moist Broadleaf Forests             | Western Congo Basin moist forests             | Photograph | All      | no data | Philipp Henschel                       |
| Non-melanistic 68  | <i>pardus</i>     | Bereket Girma Wildlife Rascue, Ethiopia           | 9.0639       | 38.5470   | Montane Grasslands and Shrublands                            | Ethiopian Highlands                           | Photograph | All      | 2011    | Stephen Brend                          |
| Non-melanistic 69  | <i>pardus</i>     | Haro, Abyssinia, Ethiopia                         | 9.0104       | 34.7012   | Tropical and Subtropical Moist Broadleaf Forests             | Ethiopian montane forests                     | Photograph | All      | no data | American Museum of Natural History USA |
| Non-melanistic 70  | <i>pardus</i>     | Ivindo National Park, Gabon                       | 0.1768       | 12.9879   | Tropical and Subtropical Moist Broadleaf Forests             | Western Congo Basin moist forests             | Photograph | All      | 2009    | Philipp Henschel                       |
| Non-melanistic 71  | <i>pardus</i>     | Ivindo National Park, Gabon                       | 0.1768       | 12.9879   | Tropical and Subtropical Moist Broadleaf Forests             | Western Congo Basin moist forests             | Photograph | All      | 2009    | Philipp Henschel                       |
| Non-melanistic 72  | <i>pardus</i>     | Ivindo National Park, Gabon                       | 0.1768       | 12.9879   | Tropical and Subtropical Moist Broadleaf Forests             | Western Congo Basin moist forests             | Photograph | All      | 2009    | Philipp Henschel                       |
| Non-melanistic 73  | <i>pardus</i>     | Ivindo National Park, Gabon                       | -0.2699      | 12.7138   | Tropical and Subtropical Moist Broadleaf Forests             | Western Congo Basin moist forests             | Photograph | All      | no data | Philipp Henschel                       |
| Non-melanistic 74  | <i>pardus</i>     | Koulamoutou, Gabon                                | -0.9773      | 12.3016   | Tropical and Subtropical Moist Broadleaf Forests             | Western Congo Basin moist forests             | Photograph | All      | no data | Philipp Henschel                       |
| Non-melanistic 75  | <i>pardus</i>     | Lope National Park, Gabon                         | -0.2151      | 11.5191   | Tropical and Subtropical Grasslands, Savannas and Shrublands | Western Congolian forest-savanna mosaic       | Photograph | All      | no data | Philipp Henschel                       |
| Non-melanistic 76  | <i>pardus</i>     | Lope National Park, Gabon                         | -0.2151      | 11.5191   | Tropical and Subtropical Grasslands, Savannas and Shrublands | Western Congolian forest-savanna mosaic       | Photograph | All      | no data | Philipp Henschel                       |
| Non-melanistic 77  | <i>pardus</i>     | Lope National Park, Gabon                         | -0.5203      | 11.4897   | Tropical and Subtropical Moist Broadleaf Forests             | Congolian Coastal Forests                     | Photograph | All      | no data | Philipp Henschel                       |
| Non-melanistic 78  | <i>pardus</i>     | Lope National Park, Gabon                         | -0.5203      | 11.4897   | Tropical and Subtropical Moist Broadleaf Forests             | Congolian Coastal Forests                     | Photograph | All      | no data | Philipp Henschel                       |
| Non-melanistic 79  | <i>pardus</i>     | Lope National Park, Gabon                         | -0.6079      | 11.6042   | Tropical and Subtropical Moist Broadleaf Forests             | Congolian Coastal Forests                     | Photograph | All      | no data | Philipp Henschel                       |
| Non-melanistic 80  | <i>pardus</i>     | Lope National Park, Gabon                         | -0.6606      | 11.5551   | Tropical and Subtropical Moist Broadleaf Forests             | Congolian Coastal Forests                     | Photograph | All      | no data | Philipp Henschel                       |
| Non-melanistic 81  | <i>pardus</i>     | Lope National Park, Gabon                         | -0.1773      | 11.4754   | Tropical and Subtropical Grasslands, Savannas and Shrublands | Western Congolian forest-savanna mosaic       | Photograph | All      | no data | Philipp Henschel                       |
| Non-melanistic 82  | <i>pardus</i>     | Lope National Park, Gabon                         | -0.3088      | 11.6332   | Tropical and Subtropical Moist Broadleaf Forests             | Congolian Coastal Forests                     | Photograph | All      | no data | Philipp Henschel                       |
| Non-melanistic 83  | <i>pardus</i>     | Ogooue River, Kan Kan, Gabon                      | -0.0333      | 12.3136   | Tropical and Subtropical Moist Broadleaf Forests             | Western Congo Basin moist forests             | Photograph | All      | no data | Philipp Henschel                       |
| Non-melanistic 84  | <i>pardus</i>     | Ongongo, Gabon                                    | 1.3084       | 11.6978   | Tropical and Subtropical Moist Broadleaf Forests             | Congolian Coastal Forests                     | Photograph | All      | no data | Philipp Henschel                       |
| Non-melanistic 85  | <i>pardus</i>     | Plateau Bateke National Park, Gabon               | -2.2737      | 14.0952   | Tropical and Subtropical Grasslands, Savannas and Shrublands | Western Congolian forest-savanna mosaic       | Photograph | All      | no data | Philipp Henschel                       |
| Non-melanistic 86  | <i>saxicolor</i>  | Vashlovani Reserve, Georgia                       | 41.2115      | 46.4417   | Deserts and Xeric Shrublands                                 | Azerbaijan shrub desert and steppe            | Photograph | All      | no data | Asian Leopard Project                  |
| Non-melanistic 87  | <i>pardus</i>     | Mole National Park, Ghana                         | 9.4323       | -1.7133   | Tropical and Subtropical Grasslands, Savannas and Shrublands | West Sudanian savanna                         | Photograph | All      | no data | National Geographic Society            |
| Non-melanistic 88  | <i>pardus</i>     | Mole National Park, Ghana                         | 9.3845       | -2.0271   | Tropical and Subtropical Grasslands, Savannas and Shrublands | West Sudanian savanna                         | Photograph | All      | no data | National Geographic Society            |
| Non-melanistic 89  | <i>fusca</i>      | Achanakmar Tiger Reserve, India                   | 22.5980      | 81.8327   | Tropical and Subtropical Moist Broadleaf Forests             | Eastern highlands moist deciduous forests     | Photograph | All      | no data | Vidya Athreya                          |
| Non-melanistic 90  | <i>fusca</i>      | Achanakmar Tiger Reserve, India                   | 22.4232      | 81.7286   | Tropical and Subtropical Moist Broadleaf Forests             | Eastern highlands moist deciduous forests     | Photograph | All      | no data | Vidya Athreya                          |
| Non-melanistic 91  | <i>fusca</i>      | Akola/Rajur, India                                | 19.5507      | 73.9639   | Deserts and Xeric Shrublands                                 | Deccan thorn scrub forests                    | Photograph | All      | no data | Vidya Athreya                          |
| Non-melanistic 92  | <i>fusca</i>      | Akole, India                                      | 19.3109      | 73.4020   | Tropical and Subtropical Moist Broadleaf Forests             | North Western Ghats montane rain forests      | Photograph | All      | 2012    | Vidya Athreya                          |
| Non-melanistic 93  | <i>fusca</i>      | Akole, India                                      | 19.3258      | 73.3799   | Tropical and Subtropical Moist Broadleaf Forests             | North Western Ghats montane rain forests      | Photograph | All      | 2012    | Vidya Athreya                          |
| Non-melanistic 94  | <i>fusca</i>      | Anamalai Hills, Southern Western Ghats, India     | 12.1058      | 78.9328   | Tropical and Subtropical Dry Broadleaf Forests               | South Deccan Plateau dry deciduous forests    | Photograph | All      | no data | World Wild Fund                        |
| Non-melanistic 95  | <i>fusca</i>      | Bagdodra, Haskhova, India                         | 26.7458      | 88.2892   | Tropical and Subtropical Moist Broadleaf Forests             | Himalayan subtropical broadleaf forests       | Photograph | All      | 2012    | World Wild Fund                        |
| Non-melanistic 96  | <i>fusca</i>      | Bandipur Tiger Reserve, India                     | 11.6407      | 76.4442   | Tropical and Subtropical Moist Broadleaf Forests             | Southwestern Ghats moist forest               | Photograph | All      | 2013    | Wildlife Conservation Society          |
| Non-melanistic 97  | <i>fusca</i>      | Bhadra Tiger Reserve, India                       | 13.6071      | 75.5910   | Tropical and Subtropical Moist Broadleaf Forests             | North Western Ghats moist deciduous forests   | Photograph | All      | no data | Vidya Athreya                          |
| Non-melanistic 98  | <i>fusca</i>      | Bhadra Tiger Reserve, India                       | 13.5380      | 75.5222   | Tropical and Subtropical Moist Broadleaf Forests             | North Western Ghats moist deciduous forests   | Photograph | All      | 2011    | Conservation India                     |
| Non-melanistic 99  | <i>fusca</i>      | Bhadra Tiger Reserve, India                       | 13.6189      | 75.6286   | Tropical and Subtropical Moist Broadleaf Forests             | North Western Ghats moist deciduous forests   | Photograph | All      | 2012    | Conservation India                     |
| Non-melanistic 100 | <i>fusca</i>      | Dahra Dan, India                                  | 30.3872      | 78.1732   | Tropical and Subtropical Moist Broadleaf Forests             | Upper Gangetic Plains moist deciduous forests | Photograph | All      | no data | Goyal 2009                             |
| Non-melanistic 101 | <i>fusca</i>      | Dandeli-Anshi Tiger Reserve, India                | 13.1213      | 75.0433   | Tropical and Subtropical Moist Broadleaf Forests             | Malabar Coast moist forests                   | Photograph | All      | 2013    | Wildlife Conservation Society          |
| Non-melanistic 102 | <i>fusca</i>      | Dandeli-Anshi Tiger Reserve, India                | 13.1213      | 75.0433   | Tropical and Subtropical Moist Broadleaf Forests             | Malabar Coast moist forests                   | Photograph | All      | 2013    | Wildlife Conservation Society          |
| Non-melanistic 103 | <i>fusca</i>      | Dehing Patkai Wildlife Sanctuary, India           | 26.4451      | 93.5389   | Tropical and Subtropical Moist Broadleaf Forests             | Meghalaya subtropical forests                 | Photograph | All      | 2009    | Dipankar Ghose                         |
| Non-melanistic 104 | <i>fusca</i>      | Dudhwa National Park, India                       | 27.4659      | 79.7461   | Tropical and Subtropical Moist Broadleaf Forests             | Upper Gangetic Plains moist deciduous forests | Photograph | All      | no data | World Wild Fund                        |
| Non-melanistic 105 | <i>fusca</i>      | Dudhwa National Park, India                       | 27.2008      | 79.8949   | Tropical and Subtropical Moist Broadleaf Forests             | Upper Gangetic Plains moist deciduous forests | Photograph | All      | no data | World Wild Fund                        |
| Non-melanistic 106 | <i>fusca</i>      | Dudhwa National Park, India                       | 27.9333      | 81.3510   | Tropical and Subtropical Moist Broadleaf Forests             | Upper Gangetic Plains moist deciduous forests | Photograph | All      | no data | World Wild Fund                        |
| Non-melanistic 107 | <i>fusca</i>      | Garhwal Western Himalaya, India                   | 30.5542      | 79.3165   | Montane Grasslands and Shrublands                            | Western Himalayan alpine shrub and Meadows    | Photograph | All      | 2008    | World Wild Fund                        |
| Non-melanistic 108 | <i>fusca</i>      | Gir Forest National Park, India                   | 21.2057      | 71.1518   | Tropical and Subtropical Dry Broadleaf Forests               | Khatthiar-Gir dry deciduous forests           | Photograph | All      | no data | Singh 2005                             |
| Non-melanistic 109 | <i>fusca</i>      | Gir Forest National Park, India                   | 21.2721      | 71.1679   | Tropical and Subtropical Dry Broadleaf Forests               | Khatthiar-Gir dry deciduous forests           | Photograph | All      | no data | Smithsonian Institution                |
| Non-melanistic 110 | <i>fusca</i>      | Guwahati, India                                   | 26.1208      | 91.7107   | Tropical and Subtropical Moist Broadleaf Forests             | Meghalaya subtropical forests                 | Photograph | All      | no data | Dipankar Ghose                         |
| Non-melanistic 111 | <i>fusca</i>      | Hararicha, Mavatuv, India                         | 30.7922      | 76.1306   | Deserts and Xeric Shrublands                                 | Northwestern thorn scrub forests              | Photograph | Filtered | 1936    | American Museum of Natural History USA |
| Non-melanistic 112 | <i>fusca</i>      | Haridwar, Rajaji National Park Chila Range, India | 30.0489      | 78.3142   | Tropical and Subtropical Moist Broadleaf Forests             | Upper Gangetic Plains moist deciduous forests | Photograph | All      | no data | Smithsonian Institution                |

| Id                 | Subspecies   | Location                                         | Deg. - WGS84 |           | Biome                                                        | Ecoregion                                     | Sample     | Analysis | Year    | Source                                 |
|--------------------|--------------|--------------------------------------------------|--------------|-----------|--------------------------------------------------------------|-----------------------------------------------|------------|----------|---------|----------------------------------------|
|                    |              |                                                  | Latitude     | Longitude |                                                              |                                               |            |          |         |                                        |
| Non-melanistic 113 | <i>fusca</i> | Hyhama, Jammu And Kashmir, India                 | 33.9766      | 77.4887   | Montane Grasslands and Shrublands                            | Tibetan Plateau steppe                        | Photograph | Filtered | 1911    | National Museum of Natural History USA |
| Non-melanistic 114 | <i>fusca</i> | Hyhama, Jammu And Kashmir, India                 | 33.6569      | 77.7122   | Montane Grasslands and Shrublands                            | Tibetan Plateau steppe                        | Photograph | Filtered | 1911    | National Museum of Natural History USA |
| Non-melanistic 115 | <i>fusca</i> | Jeypore-Dehing Area, India                       | 27.1370      | 95.3860   | Tropical and Subtropical Moist Broadleaf Forests             | Brahmaputra Valley semi-evergreen forests     | Photograph | All      | no data | Kashmira Kakati                        |
| Non-melanistic 116 | <i>fusca</i> | Jeypore-Dehing Area, India                       | 27.1370      | 95.3860   | Tropical and Subtropical Moist Broadleaf Forests             | Brahmaputra Valley semi-evergreen forests     | Photograph | All      | no data | Kashmira Kakati                        |
| Non-melanistic 117 | <i>fusca</i> | Jeypore-Dehing Area, India                       | 27.1370      | 95.3860   | Tropical and Subtropical Moist Broadleaf Forests             | Brahmaputra Valley semi-evergreen forests     | Photograph | All      | no data | Kashmira Kakati                        |
| Non-melanistic 118 | <i>fusca</i> | Jeypore-Dehing Area, India                       | 27.0584      | 95.5366   | Tropical and Subtropical Moist Broadleaf Forests             | Brahmaputra Valley semi-evergreen forests     | Photograph | All      | no data | Kashmira Kakati                        |
| Non-melanistic 119 | <i>fusca</i> | Jeypore-Dehing Area, India                       | 27.2488      | 95.5193   | Tropical and Subtropical Moist Broadleaf Forests             | Brahmaputra Valley semi-evergreen forests     | Photograph | All      | no data | Kashmira Kakati                        |
| Non-melanistic 120 | <i>fusca</i> | Jeypore-Dehing Area, India                       | 27.2488      | 95.5193   | Tropical and Subtropical Moist Broadleaf Forests             | Brahmaputra Valley semi-evergreen forests     | Photograph | All      | no data | Kashmira Kakati                        |
| Non-melanistic 121 | <i>fusca</i> | Jeypore-Dehing Area, India                       | 27.6499      | 95.4474   | Tropical and Subtropical Moist Broadleaf Forests             | Brahmaputra Valley semi-evergreen forests     | Photograph | All      | no data | Kashmira Kakati                        |
| Non-melanistic 122 | <i>fusca</i> | Jeypore-Dehing Area, India                       | 27.1285      | 95.8475   | Temperate Broadleaf and Mixed Forests                        | Eastern Himalayan broadleaf forests           | Photograph | All      | no data | Kashmira Kakati                        |
| Non-melanistic 123 | <i>fusca</i> | Jeypore-Dehing Area, India                       | 27.1285      | 95.8475   | Temperate Broadleaf and Mixed Forests                        | Eastern Himalayan broadleaf forests           | Photograph | All      | no data | Kashmira Kakati                        |
| Non-melanistic 124 | <i>fusca</i> | Jeypore-Dehing Area, India                       | 27.2331      | 95.6986   | Tropical and Subtropical Moist Broadleaf Forests             | Brahmaputra Valley semi-evergreen forests     | Photograph | All      | no data | Kashmira Kakati                        |
| Non-melanistic 125 | <i>fusca</i> | Jeypore-Dehing Area, India                       | 27.2331      | 95.6986   | Tropical and Subtropical Moist Broadleaf Forests             | Brahmaputra Valley semi-evergreen forests     | Photograph | All      | no data | Kashmira Kakati                        |
| Non-melanistic 126 | <i>fusca</i> | Jeypore-Dehing Area, India                       | 27.3618      | 95.7520   | Tropical and Subtropical Moist Broadleaf Forests             | Brahmaputra Valley semi-evergreen forests     | Photograph | All      | no data | Kashmira Kakati                        |
| Non-melanistic 127 | <i>fusca</i> | Jeypore-Dehing Area, India                       | 27.3618      | 95.7520   | Tropical and Subtropical Moist Broadleaf Forests             | Brahmaputra Valley semi-evergreen forests     | Photograph | All      | no data | Kashmira Kakati                        |
| Non-melanistic 128 | <i>fusca</i> | Jeypore-Dehing Area, India                       | 27.4243      | 95.7601   | Tropical and Subtropical Moist Broadleaf Forests             | Brahmaputra Valley semi-evergreen forests     | Photograph | All      | no data | Kashmira Kakati                        |
| Non-melanistic 129 | <i>fusca</i> | Jeypore-Dehing Area, India                       | 27.4243      | 95.7601   | Tropical and Subtropical Moist Broadleaf Forests             | Brahmaputra Valley semi-evergreen forests     | Photograph | All      | no data | Kashmira Kakati                        |
| Non-melanistic 130 | <i>fusca</i> | Jeypore-Dehing Area, India                       | 27.5402      | 95.7905   | Tropical and Subtropical Moist Broadleaf Forests             | Brahmaputra Valley semi-evergreen forests     | Photograph | All      | no data | Kashmira Kakati                        |
| Non-melanistic 131 | <i>fusca</i> | Jeypore-Dehing Area, India                       | 27.5402      | 95.7905   | Tropical and Subtropical Moist Broadleaf Forests             | Brahmaputra Valley semi-evergreen forests     | Photograph | All      | no data | Kashmira Kakati                        |
| Non-melanistic 132 | <i>fusca</i> | Jeypore-Dehing Area, India                       | 27.5402      | 95.7905   | Tropical and Subtropical Moist Broadleaf Forests             | Brahmaputra Valley semi-evergreen forests     | Photograph | All      | no data | Kashmira Kakati                        |
| Non-melanistic 133 | <i>fusca</i> | Kabini, Bandipur, India                          | 34.1378      | 75.0364   | Temperate Broadleaf and Mixed Forests                        | Western Himalayan broadleaf forests           | Photograph | All      | no data | Vidya Athreya                          |
| Non-melanistic 134 | <i>fusca</i> | Karnataka, India                                 | 12.8232      | 76.0097   | Tropical and Subtropical Moist Broadleaf Forests             | North Western Ghats moist deciduous forests   | Photograph | All      | 2013    | World Wild Fund                        |
| Non-melanistic 135 | <i>fusca</i> | Kanavde, India                                   | 19.5468      | 74.0299   | Deserts and Xeric Shrublands                                 | Deccan thorn scrub forests                    | Photograph | All      | no data | Vidya Athreya                          |
| Non-melanistic 136 | <i>fusca</i> | Kanha Tiger Reserve, Madhya Pradesh, India       | 23.2809      | 80.4837   | Tropical and Subtropical Moist Broadleaf Forests             | Eastern Deccan plateau moist forests          | Photograph | All      | no data | Christoph Knogge                       |
| Non-melanistic 137 | <i>fusca</i> | Kanha Tiger Reserve, Madhya Pradesh, India       | 23.0263      | 80.7801   | Tropical and Subtropical Moist Broadleaf Forests             | Eastern Deccan plateau moist forests          | Photograph | All      | 2013    | Sandeep Sharma                         |
| Non-melanistic 138 | <i>fusca</i> | Knagar, India                                    | 19.5177      | 74.0293   | Deserts and Xeric Shrublands                                 | Deccan thorn scrub forests                    | Photograph | All      | no data | Vidya Athreya                          |
| Non-melanistic 139 | <i>fusca</i> | Kormar Gudda, India                              | 22.9019      | 81.1676   | Tropical and Subtropical Moist Broadleaf Forests             | Eastern Deccan plateau moist forests          | Photograph | All      | no data | Kashmira Kakati                        |
| Non-melanistic 140 | <i>fusca</i> | Kundur, India                                    | 23.4147      | 80.7939   | Tropical and Subtropical Moist Broadleaf Forests             | Eastern Deccan plateau moist forests          | Photograph | All      | no data | Kashmira Kakati                        |
| Non-melanistic 141 | <i>fusca</i> | Kupwara Forest, India                            | 34.5811      | 74.3511   | Temperate Broadleaf and Mixed Forests                        | Western Himalayan broadleaf forests           | Photograph | All      | no data | Kashmira Kakati                        |
| Non-melanistic 142 | <i>fusca</i> | Madras, Mavatu, India                            | 31.4190      | 76.5938   | Tropical and Subtropical Coniferous Forests                  | Himalayan subtropical pine forests            | Photograph | Filtered | 1936    | American Museum of Natural History USA |
| Non-melanistic 143 | <i>fusca</i> | Mundanthur Sanctuary, India                      | 8.7603       | 77.2816   | Tropical and Subtropical Moist Broadleaf Forests             | Southwestern Ghats moist forest               | Photograph | All      | no data | Christoph Knogge                       |
| Non-melanistic 144 | <i>fusca</i> | Mundanthur Sanctuary, India                      | 8.7252       | 77.2885   | Tropical and Subtropical Moist Broadleaf Forests             | Southwestern Ghats moist forest               | Photograph | All      | no data | Christoph Knogge                       |
| Non-melanistic 145 | <i>fusca</i> | Nagarjunasagar Srisailem Tiger Reserve, India    | 16.4090      | 79.2564   | Tropical and Subtropical Dry Broadleaf Forests               | Central Deccan Plateau dry deciduous forests  | Photograph | All      | 2011    | World Wild Fund                        |
| Non-melanistic 146 | <i>fusca</i> | Naimeri National Park, India                     | 26.9456      | 92.7255   | Tropical and Subtropical Moist Broadleaf Forests             | Brahmaputra Valley semi-evergreen forests     | Photograph | All      | 2011    | World Wild Fund                        |
| Non-melanistic 147 | <i>fusca</i> | Pauri Garhwal, India                             | 29.8702      | 78.9477   | Tropical and Subtropical Coniferous Forests                  | Himalayan subtropical pine forests            | Photograph | All      | no data | Goyal 2009                             |
| Non-melanistic 148 | <i>fusca</i> | Pakke Tiger Reserve in Arunachal Pradesh, India  | 28.5669      | 95.9691   | Temperate Broadleaf and Mixed Forests                        | Eastern Himalayan broadleaf forests           | Photograph | All      | 2013    | Milind Pariwakam/Biswajit Mohanty      |
| Non-melanistic 149 | <i>fusca</i> | Philibhit, India                                 | 28.6421      | 79.9662   | Tropical and Subtropical Moist Broadleaf Forests             | Upper Gangetic Plains moist deciduous forests | Photograph | All      | 2010    | World Wild Fund                        |
| Non-melanistic 150 | <i>fusca</i> | Philibhit, India                                 | 28.6355      | 79.8480   | Tropical and Subtropical Moist Broadleaf Forests             | Upper Gangetic Plains moist deciduous forests | Photograph | All      | 2010    | World Wild Fund                        |
| Non-melanistic 151 | <i>fusca</i> | Sanaripur, India                                 | 30.0183      | 77.5406   | Tropical and Subtropical Moist Broadleaf Forests             | Upper Gangetic Plains moist deciduous forests | Photograph | Filtered | 1923    | American Museum of Natural History USA |
| Non-melanistic 152 | <i>fusca</i> | Sanaripur, India                                 | 30.0183      | 77.5406   | Tropical and Subtropical Moist Broadleaf Forests             | Upper Gangetic Plains moist deciduous forests | Photograph | Filtered | 1923    | American Museum of Natural History USA |
| Non-melanistic 153 | <i>fusca</i> | Sanaripur, India                                 | 29.9502      | 77.5913   | Tropical and Subtropical Moist Broadleaf Forests             | Upper Gangetic Plains moist deciduous forests | Photograph | Filtered | 1923    | American Museum of Natural History USA |
| Non-melanistic 154 | <i>fusca</i> | Sanjay Gandhi National Park, India               | 19.2325      | 72.9024   | Tropical and Subtropical Moist Broadleaf Forests             | Malabar Coast moist forests                   | Photograph | All      | 2012    | Conservation India                     |
| Non-melanistic 155 | <i>fusca</i> | Sanjay Gandhi National Park, India               | 19.2141      | 72.9253   | Tropical and Subtropical Moist Broadleaf Forests             | Malabar Coast moist forests                   | Photograph | All      | 2013    | Conservation India                     |
| Non-melanistic 156 | <i>fusca</i> | Sanjay Gandhi National Park, India               | 19.1726      | 72.8914   | Tropical and Subtropical Moist Broadleaf Forests             | Malabar Coast moist forests                   | Photograph | All      | 2013    | Conservation India                     |
| Non-melanistic 157 | <i>fusca</i> | Sanjay Gandhi National Park, India               | 19.1726      | 72.8914   | Tropical and Subtropical Moist Broadleaf Forests             | Malabar Coast moist forests                   | Photograph | All      | 2013    | Conservation India                     |
| Non-melanistic 158 | <i>fusca</i> | Sariska Tiger Reserve, India                     | 27.4076      | 76.7404   | Tropical and Subtropical Dry Broadleaf Forests               | Khathiar-Gir dry deciduous forests            | Photograph | All      | no data | National Geographic Society            |
| Non-melanistic 159 | <i>fusca</i> | Sariska Tiger Reserve, India                     | 27.3019      | 76.7276   | Tropical and Subtropical Dry Broadleaf Forests               | Khathiar-Gir dry deciduous forests            | Photograph | All      | no data | National Geographic Society            |
| Non-melanistic 160 | <i>fusca</i> | Sariska Tiger Reserve, India                     | 27.2146      | 76.4171   | Tropical and Subtropical Dry Broadleaf Forests               | Khathiar-Gir dry deciduous forests            | Photograph | All      | no data | Chauhan et al 2005                     |
| Non-melanistic 161 | <i>fusca</i> | Sariska Tiger Reserve, India                     | 27.2146      | 76.4171   | Tropical and Subtropical Dry Broadleaf Forests               | Khathiar-Gir dry deciduous forests            | Photograph | All      | no data | Chauhan et al 2005                     |
| Non-melanistic 162 | <i>fusca</i> | Sariska Tiger Reserve, India                     | 27.2426      | 76.3155   | Tropical and Subtropical Dry Broadleaf Forests               | Khathiar-Gir dry deciduous forests            | Photograph | All      | no data | Chauhan et al 2005                     |
| Non-melanistic 163 | <i>fusca</i> | Sariska Tiger Reserve, India                     | 27.1166      | 76.2561   | Tropical and Subtropical Dry Broadleaf Forests               | Khathiar-Gir dry deciduous forests            | Photograph | All      | no data | Chauhan et al 2005                     |
| Non-melanistic 164 | <i>fusca</i> | Sariska Tiger Reserve, India                     | 27.3059      | 76.4886   | Tropical and Subtropical Dry Broadleaf Forests               | Khathiar-Gir dry deciduous forests            | Photograph | All      | no data | Chauhan et al 2005                     |
| Non-melanistic 165 | <i>fusca</i> | Shivaji, India                                   | 19.5854      | 73.9862   | Deserts and Xeric Shrublands                                 | Deccan thorn scrub forests                    | Photograph | All      | no data | Vidya Athreya                          |
| Non-melanistic 166 | <i>fusca</i> | Siliguri, Prakash Nagar, India                   | 26.8001      | 88.4827   | Tropical and Subtropical Grasslands, Savannas and Shrublands | Terai-Duar savanna and grasslands             | Photograph | All      | 2011    | Vidya Athreya                          |
| Non-melanistic 167 | <i>fusca</i> | Tadoba Andhari Tiger Reserve, Maharashtra, India | 20.2085      | 79.5276   | Tropical and Subtropical Dry Broadleaf Forests               | Central Deccan Plateau dry deciduous forests  | Photograph | All      | no data | Vidya Athreya                          |
| Non-melanistic 168 | <i>fusca</i> | Talewadi, India                                  | 19.5107      | 73.9672   | Deserts and Xeric Shrublands                                 | Deccan thorn scrub forests                    | Photograph | All      | no data | Vidya Athreya                          |
| Non-melanistic 169 | <i>fusca</i> | Uttarakhand, India                               | 30.0002      | 80.2295   | Temperate Broadleaf and Mixed Forests                        | Western Himalayan broadleaf forests           | Photograph | All      | no data | Goyal 2009                             |
| Non-melanistic 170 | <i>fusca</i> | Uttarakhand, India                               | 30.3109      | 79.6338   | Montane Grasslands and Shrublands                            | Western Himalayan alpine shrub and Meadows    | Photograph | All      | no data | Goyal 2009                             |
| Non-melanistic 171 | <i>fusca</i> | Uttarakhand, India                               | 30.4446      | 79.6386   | Montane Grasslands and Shrublands                            | Western Himalayan alpine shrub and Meadows    | Photograph | All      | no data | Goyal 2009                             |
| Non-melanistic 172 | <i>fusca</i> | Uttarakhand, India                               | 29.9234      | 79.6530   | Tropical and Subtropical Coniferous Forests                  | Himalayan subtropical pine forests            | Photograph | All      | no data | Goyal 2009                             |
| Non-melanistic 173 | <i>fusca</i> | Uttaranchal, India                               | 30.3076      | 80.1796   | Montane Grasslands and Shrublands                            | Western Himalayan alpine shrub and Meadows    | Photograph | All      | no data | Marker & Sivamani 2009                 |

| Id                 | Subspecies       | Location                                           | Deg. - WGS84 |           | Biome                                                        | Ecoregion                                      | Sample     | Analysis | Year    | Source                                 |
|--------------------|------------------|----------------------------------------------------|--------------|-----------|--------------------------------------------------------------|------------------------------------------------|------------|----------|---------|----------------------------------------|
|                    |                  |                                                    | Latitude     | Longitude |                                                              |                                                |            |          |         |                                        |
| Non-melanistic 174 | <i>fuscus</i>    | Vitbhatti, India                                   | 19.5298      | 74.0396   | Deserts and Xeric Shrublands                                 | Deccan thorn scrub forests                     | Photograph | All      | no data | Vidya Athreya                          |
| Non-melanistic 175 | <i>melas</i>     | Baluran National Park, Java, Indonesia             | -7.8044      | 114.3797  | Tropical and Subtropical Moist Broadleaf Forests             | Eastern Java-Bali rain forests                 | Photograph | All      | 2012    | Copenhagen Zoo                         |
| Non-melanistic 176 | <i>melas</i>     | Baluran National Park, Java, Indonesia             | -7.8878      | 114.3786  | Tropical and Subtropical Moist Broadleaf Forests             | Eastern Java-Bali rain forests                 | Photograph | All      | 2012    | Copenhagen Zoo                         |
| Non-melanistic 177 | <i>melas</i>     | Bengkung, Java, Indonesia                          | -6.7706      | 106.4565  | Tropical and Subtropical Moist Broadleaf Forests             | Western Java rain forests                      | Photograph | All      | no data | WildCru                                |
| Non-melanistic 178 | <i>melas</i>     | Gunung Salak National Park, Java, Indonesia        | -7.2547      | 107.4355  | Tropical and Subtropical Moist Broadleaf Forests             | Western Java rain forests                      | Photograph | All      | no data | CIFOR                                  |
| Non-melanistic 179 | <i>melas</i>     | Halimun-Salak, Java, Indonesia                     | -6.7847      | 106.5780  | Tropical and Subtropical Moist Broadleaf Forests             | Western Java rain forests                      | Photograph | All      | 2004    | Anhar Harahap                          |
| Non-melanistic 180 | <i>melas</i>     | Mount Halimun-Salak National Park, Java, Indonesia | -7.1029      | 107.3755  | Tropical and Subtropical Moist Broadleaf Forests             | Western Java rain forests                      | Photograph | All      | no data | CIFOR                                  |
| Non-melanistic 181 | <i>melas</i>     | Pelaboean Ratoe, Java, Indonesia                   | -6.9882      | 106.5549  | Tropical and Subtropical Moist Broadleaf Forests             | Western Java rain forests                      | Photograph | All      | 1909    | National Museum of Natural History USA |
| Non-melanistic 182 | <i>melas</i>     | Ujung Kulon National Park, Java, Indonesia         | -6.7339      | 105.3438  | Tropical and Subtropical Moist Broadleaf Forests             | Western Java rain forests                      | Photograph | All      | no data | WildCru                                |
| Non-melanistic 183 | <i>saxicolor</i> | Alborz Mountains, Iran                             | 36.4611      | 51.4824   | Temperate Broadleaf and Mixed Forests                        | Caspian Hyrcanian mixed forests                | Photograph | All      | no data | Farhadinia et al 2007                  |
| Non-melanistic 184 | <i>saxicolor</i> | Bafq, Iran                                         | 31.8150      | 55.2717   | Deserts and Xeric Shrublands                                 | Central Persian desert basins                  | Photograph | All      | 2012    | Asian Leopard Project                  |
| Non-melanistic 185 | <i>saxicolor</i> | Bafq, Iran                                         | 31.7713      | 55.3136   | Deserts and Xeric Shrublands                                 | Central Persian desert basins                  | Photograph | All      | 2013    | Panthera                               |
| Non-melanistic 186 | <i>saxicolor</i> | Bafq, Iran                                         | 31.7713      | 55.3136   | Deserts and Xeric Shrublands                                 | Central Persian desert basins                  | Photograph | All      | 2013    | Panthera                               |
| Non-melanistic 187 | <i>saxicolor</i> | Bafq, Iran                                         | 32.2349      | 55.4353   | Deserts and Xeric Shrublands                                 | Central Persian desert basins                  | Photograph | All      | 2013    | Panthera                               |
| Non-melanistic 188 | <i>saxicolor</i> | Bafq, Iran                                         | 32.2349      | 55.4353   | Deserts and Xeric Shrublands                                 | Central Persian desert basins                  | Photograph | All      | 2013    | Panthera                               |
| Non-melanistic 189 | <i>saxicolor</i> | Bafq, Iran                                         | 31.6719      | 55.0649   | Deserts and Xeric Shrublands                                 | Central Persian desert basins                  | Photograph | All      | 2013    | Panthera                               |
| Non-melanistic 190 | <i>saxicolor</i> | Bamu National Park, Iran                           | 29.6579      | 53.1614   | Temperate Broadleaf and Mixed Forests                        | Zagros Mountains forest steppe                 | Photograph | All      | no data | Arash Ghoddousi                        |
| Non-melanistic 191 | <i>saxicolor</i> | Bamu National Park, Iran                           | 29.8867      | 52.9034   | Temperate Broadleaf and Mixed Forests                        | Zagros Mountains forest steppe                 | Photograph | All      | no data | Arash Ghoddousi                        |
| Non-melanistic 192 | <i>saxicolor</i> | Bamu National Park, Iran                           | 29.8339      | 52.9008   | Temperate Broadleaf and Mixed Forests                        | Zagros Mountains forest steppe                 | Photograph | All      | no data | Arash Ghoddousi                        |
| Non-melanistic 193 | <i>saxicolor</i> | Bamu National Park, Iran                           | 29.8853      | 52.9552   | Temperate Broadleaf and Mixed Forests                        | Zagros Mountains forest steppe                 | Photograph | All      | no data | Arash Ghoddousi                        |
| Non-melanistic 194 | <i>saxicolor</i> | Bamu National Park, Iran                           | 29.8853      | 52.9552   | Temperate Broadleaf and Mixed Forests                        | Zagros Mountains forest steppe                 | Photograph | All      | no data | Arash Ghoddousi                        |
| Non-melanistic 195 | <i>saxicolor</i> | Bamu National Park, Iran                           | 29.8853      | 52.9552   | Temperate Broadleaf and Mixed Forests                        | Zagros Mountains forest steppe                 | Photograph | All      | no data | Arash Ghoddousi                        |
| Non-melanistic 196 | <i>saxicolor</i> | Bamu National Park, Iran                           | 29.8853      | 52.9552   | Temperate Broadleaf and Mixed Forests                        | Zagros Mountains forest steppe                 | Photograph | All      | no data | Arash Ghoddousi                        |
| Non-melanistic 197 | <i>saxicolor</i> | Bamu National Park, Iran                           | 29.8853      | 52.9552   | Temperate Broadleaf and Mixed Forests                        | Zagros Mountains forest steppe                 | Photograph | All      | no data | Arash Ghoddousi                        |
| Non-melanistic 198 | <i>saxicolor</i> | Bamu National Park, Iran                           | 29.8150      | 52.9750   | Temperate Broadleaf and Mixed Forests                        | Zagros Mountains forest steppe                 | Photograph | All      | no data | Arash Ghoddousi                        |
| Non-melanistic 199 | <i>saxicolor</i> | Bandar-Gaz, Iran                                   | 26.6795      | 55.0549   | Deserts and Xeric Shrublands                                 | South Iran Nubo-Sindian desert and semi-desert | Photograph | All      | no data | Asian Leopard Project                  |
| Non-melanistic 200 | <i>saxicolor</i> | Birk Protected Area, Iran                          | 29.6558      | 58.3126   | Deserts and Xeric Shrublands                                 | South Iran Nubo-Sindian desert and semi-desert | Photograph | All      | no data | Asian Leopard Project                  |
| Non-melanistic 201 | <i>saxicolor</i> | Birk Protected Area, Iran                          | 29.5872      | 58.3913   | Deserts and Xeric Shrublands                                 | South Iran Nubo-Sindian desert and semi-desert | Photograph | All      | no data | Asian Leopard Project                  |
| Non-melanistic 202 | <i>saxicolor</i> | Dargaz, Khorasan Province, Iran                    | 36.9854      | 58.6955   | Deserts and Xeric Shrublands                                 | Central Persian desert basins                  | Photograph | All      | no data | Asian Leopard Project                  |
| Non-melanistic 203 | <i>saxicolor</i> | Ghorkhod & Behkadeh Reserve, Iran                  | 37.6015      | 56.5290   | Temperate Broadleaf and Mixed Forests                        | Caucasus-Anatolian-Hyrcanian temperate forests | Photograph | All      | no data | Farhadinia et al 2007                  |
| Non-melanistic 204 | <i>saxicolor</i> | Golestan National Park, Iran                       | 38.0852      | 56.4868   | Montane Grasslands and Shrublands                            | Kopet Dag woodlands and forest steppe          | Photograph | All      | no data | Asian Leopard Project                  |
| Non-melanistic 205 | <i>saxicolor</i> | Gorgan-Golestan, Iran                              | 37.2019      | 54.6584   | Deserts and Xeric Shrublands                                 | Caspian lowland desert                         | Photograph | All      | no data | Asian Leopard Project                  |
| Non-melanistic 206 | <i>saxicolor</i> | Gorgan-Golestan, Iran                              | 37.2709      | 54.3942   | Deserts and Xeric Shrublands                                 | Caspian lowland desert                         | Photograph | All      | no data | Asian Leopard Project                  |
| Non-melanistic 207 | <i>saxicolor</i> | Gouladah, Bujnurd, Iran                            | 37.4797      | 57.2698   | Deserts and Xeric Shrublands                                 | Central Persian desert basins                  | Photograph | All      | 1938    | American Museum of Natural History USA |
| Non-melanistic 208 | <i>saxicolor</i> | Kerman, Iran                                       | 30.3739      | 57.3553   | Montane Grasslands and Shrublands                            | Kuh Rud and Eastern Iran montane woodlands     | Photograph | All      | no data | Asian Leopard Project                  |
| Non-melanistic 209 | <i>saxicolor</i> | Khazez Area, Iran                                  | 28.7051      | 51.5107   | Deserts and Xeric Shrublands                                 | South Iran Nubo-Sindian desert and semi-desert | Photograph | All      | no data | Abdoli et al 2008                      |
| Non-melanistic 210 | <i>saxicolor</i> | Khojir National Park, Iran                         | 35.5963      | 51.8186   | Deserts and Xeric Shrublands                                 | Central Persian desert basins                  | Photograph | All      | no data | Asian Leopard Project                  |
| Non-melanistic 211 | <i>saxicolor</i> | Khorasan Province, Iran                            | 35.8595      | 60.1116   | Deserts and Xeric Shrublands                                 | Central Persian desert basins                  | Photograph | All      | no data | Asian Leopard Project                  |
| Non-melanistic 212 | <i>saxicolor</i> | Khorasan Province, Iran                            | 33.2073      | 60.3131   | Montane Grasslands and Shrublands                            | Kuh Rud and Eastern Iran montane woodlands     | Photograph | All      | no data | Asian Leopard Project                  |
| Non-melanistic 213 | <i>saxicolor</i> | Khorasan Province, Iran                            | 35.5268      | 59.2535   | Montane Grasslands and Shrublands                            | Kuh Rud and Eastern Iran montane woodlands     | Photograph | All      | no data | Asian Leopard Project                  |
| Non-melanistic 214 | <i>saxicolor</i> | Khorasan Province, Iran                            | 34.2792      | 58.7812   | Deserts and Xeric Shrublands                                 | Central Persian desert basins                  | Photograph | All      | no data | Asian Leopard Project                  |
| Non-melanistic 215 | <i>saxicolor</i> | Khorasan Province, Iran                            | 33.1146      | 59.2725   | Montane Grasslands and Shrublands                            | Kuh Rud and Eastern Iran montane woodlands     | Photograph | All      | no data | Asian Leopard Project                  |
| Non-melanistic 216 | <i>saxicolor</i> | Khorasan Province, Iran                            | 35.6120      | 58.3048   | Montane Grasslands and Shrublands                            | Kuh Rud and Eastern Iran montane woodlands     | Photograph | All      | no data | Asian Leopard Project                  |
| Non-melanistic 217 | <i>saxicolor</i> | Khosh, Semnan Province, Iran                       | 35.5550      | 55.3459   | Deserts and Xeric Shrublands                                 | Central Persian desert basins                  | Photograph | All      | no data | Asian Leopard Project                  |
| Non-melanistic 218 | <i>saxicolor</i> | Kiamaki Wildlife Reserve, Iran                     | 38.7594      | 45.8547   | Temperate Grasslands, Savannas and Shrublands                | Eastern Anatolian montane steppe               | Photograph | All      | no data | Asian Leopard Project                  |
| Non-melanistic 219 | <i>saxicolor</i> | Laristan, Bariz, Iran                              | 33.5913      | 49.1922   | Temperate Broadleaf and Mixed Forests                        | Zagros Mountains forest steppe                 | Photograph | All      | 1963    | National Museum of Natural History USA |
| Non-melanistic 220 | <i>saxicolor</i> | Laristan, Fars, Iran                               | 33.3084      | 49.2420   | Temperate Broadleaf and Mixed Forests                        | Zagros Mountains forest steppe                 | Photograph | All      | 1963    | National Museum of Natural History USA |
| Non-melanistic 221 | <i>saxicolor</i> | Mazandaran, Iran                                   | 36.3078      | 52.1673   | Temperate Broadleaf and Mixed Forests                        | Caspian Hyrcanian mixed forests                | Photograph | All      | no data | Asian Leopard Project                  |
| Non-melanistic 222 | <i>saxicolor</i> | Mazandaran, Iran                                   | 36.3296      | 53.0279   | Temperate Broadleaf and Mixed Forests                        | Caspian Hyrcanian mixed forests                | Photograph | All      | no data | Asian Leopard Project                  |
| Non-melanistic 223 | <i>saxicolor</i> | Neishabour, Khorasan Province, Iran                | 36.2544      | 58.8633   | Temperate Coniferous Forest                                  | Caucasus-Anatolian-Hyrcanian temperate forests | Photograph | All      | no data | Asian Leopard Project                  |
| Non-melanistic 224 | <i>saxicolor</i> | North Khorasan, Iran                               | 35.8884      | 58.6493   | Deserts and Xeric Shrublands                                 | Central Persian desert basins                  | Photograph | All      | 2012    | Asian Leopard Project                  |
| Non-melanistic 225 | <i>saxicolor</i> | Qualanlu, Iran                                     | 37.5376      | 56.4123   | Temperate Coniferous Forest                                  | Caucasus-Anatolian-Hyrcanian temperate forests | Photograph | All      | 2013    | Asian Leopard Project                  |
| Non-melanistic 226 | <i>saxicolor</i> | Qualanlu, Iran                                     | 37.5425      | 56.1588   | Temperate Broadleaf and Mixed Forests                        | Caspian Hyrcanian mixed forests                | Photograph | All      | 2013    | Asian Leopard Project                  |
| Non-melanistic 227 | <i>saxicolor</i> | Sarigol National Park, Iran                        | 37.8396      | 57.0308   | Montane Grasslands and Shrublands                            | Kopet Dag woodlands and forest steppe          | Photograph | All      | 2007    | Farhadinia et al 2010                  |
| Non-melanistic 228 | <i>saxicolor</i> | Sarigol National Park, Iran                        | 37.8784      | 56.6037   | Montane Grasslands and Shrublands                            | Kopet Dag woodlands and forest steppe          | Photograph | All      | 2007    | Farhadinia et al 2010                  |
| Non-melanistic 229 | <i>saxicolor</i> | Talysh Mountains, Iran                             | 38.8721      | 46.3442   | Temperate Grasslands, Savannas and Shrublands                | Eastern Anatolian montane steppe               | Photograph | All      | 2007    | Lukarevsky et al 2007                  |
| Non-melanistic 230 | <i>saxicolor</i> | Tandoureh National Park, Iran                      | 37.2770      | 58.4683   | Montane Grasslands and Shrublands                            | Kopet Dag woodlands and forest steppe          | Photograph | All      | no data | Sayed Babak                            |
| Non-melanistic 231 | <i>pardus</i>    | Cheranganghi Hills, Kenya                          | -1.4972      | 36.6726   | Tropical and Subtropical Grasslands, Savannas and Shrublands | East African Acacia Savannas                   | Photograph | All      | no data | American Museum of Natural History USA |
| Non-melanistic 232 | <i>pardus</i>    | Cheranganghi Hills, Kenya                          | -1.6135      | 36.7174   | Tropical and Subtropical Grasslands, Savannas and Shrublands | East African Acacia Savannas                   | Photograph | All      | no data | American Museum of Natural History USA |
| Non-melanistic 233 | <i>pardus</i>    | Elgeyo Forest, Kenya                               | 1.0730       | 35.2871   | Tropical and Subtropical Moist Broadleaf Forests             | East African montane forests                   | Photograph | All      | no data | American Museum of Natural History USA |
| Non-melanistic 234 | <i>pardus</i>    | Endau, Kenya                                       | -1.3345      | 38.6644   | Tropical and Subtropical Grasslands, Savannas and Shrublands | East African Acacia Savannas                   | Photograph | All      | no data | Smithsonian Institution                |

| Id                 | Subspecies       | Location                                   | Deg. - WGS84 |           | Biome                                                        | Ecoregion                                 | Sample     | Analysis | Year    | Source                                 |
|--------------------|------------------|--------------------------------------------|--------------|-----------|--------------------------------------------------------------|-------------------------------------------|------------|----------|---------|----------------------------------------|
|                    |                  |                                            | Latitude     | Longitude |                                                              |                                           |            |          |         |                                        |
| Non-melanistic 235 | <i>pardus</i>    | Ewaso Lions Camp, Kenya                    | -1.4226      | 36.8473   | Tropical and Subtropical Grasslands, Savannas and Shrublands | East African Acacia Savannas              | Photograph | All      | no data | Phillip Henschel                       |
| Non-melanistic 236 | <i>pardus</i>    | Guaso Ngishu Plateau, Kenya                | -1.1088      | 36.5234   | Tropical and Subtropical Grasslands, Savannas and Shrublands | East African Acacia Savannas              | Photograph | All      | 1909    | National Museum of Natural History USA |
| Non-melanistic 237 | <i>pardus</i>    | Kampi Moto, Nakuru, Kenya                  | -0.4294      | 36.1020   | Tropical and Subtropical Grasslands, Savannas and Shrublands | East African Acacia Savannas              | Photograph | All      | 1909    | National Museum of Natural History USA |
| Non-melanistic 238 | <i>pardus</i>    | Lake Naivasha, Kenya                       | -0.6986      | 36.3578   | Tropical and Subtropical Grasslands, Savannas and Shrublands | East African Acacia Savannas              | Photograph | All      | 1909    | National Museum of Natural History USA |
| Non-melanistic 239 | <i>pardus</i>    | Lake Naivasha, S End, Kenya                | -0.8683      | 36.2074   | Tropical and Subtropical Grasslands, Savannas and Shrublands | East African Acacia Savannas              | Photograph | All      | 1909    | National Museum of Natural History USA |
| Non-melanistic 240 | <i>pardus</i>    | Masai Mara Game Reserve, Kenya             | -1.4803      | 35.1052   | Tropical and Subtropical Grasslands, Savannas and Shrublands | East African Acacia Savannas              | Photograph | All      | no data | Smithsonian Institution                |
| Non-melanistic 241 | <i>pardus</i>    | Magadi, Kenya                              | -1.7446      | 36.3396   | Tropical and Subtropical Grasslands, Savannas and Shrublands | East African Acacia Savannas              | Photograph | All      | 2010    | Smithsonian Institution                |
| Non-melanistic 242 | <i>pardus</i>    | Magadi, Kenya                              | -1.7837      | 36.3508   | Tropical and Subtropical Grasslands, Savannas and Shrublands | East African Acacia Savannas              | Photograph | All      | 2010    | Smithsonian Institution                |
| Non-melanistic 243 | <i>pardus</i>    | Masai Mara National Park, Kenya            | -1.2992      | 34.8167   | Tropical and Subtropical Moist Broadleaf Forests             | East African montane forests              | Photograph | All      | no data | Phillip Henschel                       |
| Non-melanistic 244 | <i>pardus</i>    | Masai Mara National Park, Kenya            | -1.6613      | 35.3135   | Tropical and Subtropical Grasslands, Savannas and Shrublands | East African Acacia Savannas              | Photograph | All      | no data | Phillip Henschel                       |
| Non-melanistic 245 | <i>pardus</i>    | Masai Mara National Park, Kenya            | -1.4010      | 34.8578   | Tropical and Subtropical Grasslands, Savannas and Shrublands | East African Acacia Savannas              | Photograph | All      | no data | Phillip Henschel                       |
| Non-melanistic 246 | <i>pardus</i>    | Mount Kenya's, Kenya                       | -0.3075      | 37.5967   | Tropical and Subtropical Grasslands, Savannas and Shrublands | East African Acacia Savannas              | Photograph | All      | no data | Smithsonian Institution                |
| Non-melanistic 247 | <i>pardus</i>    | Mount Kenya's, Kenya                       | 0.0003       | 37.6178   | Tropical and Subtropical Moist Broadleaf Forests             | East African montane forests              | Photograph | All      | no data | Smithsonian Institution                |
| Non-melanistic 248 | <i>pardus</i>    | OI Pejeta Kenya's Laikipia District, Kenya | 0.1262       | 36.8511   | Tropical and Subtropical Grasslands, Savannas and Shrublands | East African Acacia Savannas              | Photograph | All      | no data | Smithsonian Institution                |
| Non-melanistic 249 | <i>pardus</i>    | South Samburu, Kenya                       | -3.6851      | 39.2473   | Tropical and Subtropical Grasslands, Savannas and Shrublands | East African Acacia Savannas              | Photograph | All      | no data | Phillip Henschel                       |
| Non-melanistic 250 | <i>pardus</i>    | Samburu Natural Reserve, Kenya             | 1.0857       | 38.2465   | Deserts and Xeric Shrublands                                 | Masai xeric grasslands and shrublands     | Photograph | All      | no data | Andrew Stein                           |
| Non-melanistic 251 | <i>pardus</i>    | Selenkay Safari Camp, Kenya                | -0.4115      | 36.0993   | Tropical and Subtropical Grasslands, Savannas and Shrublands | East African Acacia Savannas              | Photograph | All      | no data | Selenkay Safari Camp                   |
| Non-melanistic 252 | <i>pardus</i>    | Shaba National Reserve, Kenya              | 0.5476       | 37.2778   | Tropical and Subtropical Grasslands, Savannas and Shrublands | East African Acacia Savannas              | Photograph | All      | no data | Andrew Stein                           |
| Non-melanistic 253 | <i>pardus</i>    | Tumaren Ranch, Kenya                       | 0.1099       | 36.7982   | Tropical and Subtropical Grasslands, Savannas and Shrublands | East African Acacia Savannas              | Photograph | All      | 2009    | Tumaren Ranch                          |
| Non-melanistic 254 | <i>pardus</i>    | Tumaren Ranch, Kenya                       | 0.1601       | 36.6890   | Tropical and Subtropical Grasslands, Savannas and Shrublands | East African Acacia Savannas              | Photograph | All      | 2000    | Tumaren Ranch                          |
| Non-melanistic 255 | <i>pardus</i>    | Tumaren Ranch, Kenya                       | 0.1252       | 36.8827   | Tropical and Subtropical Grasslands, Savannas and Shrublands | East African Acacia Savannas              | Photograph | All      | 2010    | Tumaren Ranch                          |
| Non-melanistic 256 | <i>pardus</i>    | Tumaren Ranch, Kenya                       | 0.1113       | 36.8903   | Tropical and Subtropical Grasslands, Savannas and Shrublands | East African Acacia Savannas              | Photograph | All      | 2009    | Tumaren Ranch                          |
| Non-melanistic 257 | <i>pardus</i>    | Tumaren Ranch, Kenya                       | -0.0001      | 36.8788   | Tropical and Subtropical Grasslands, Savannas and Shrublands | East African Acacia Savannas              | Photograph | All      | 2008    | Tumaren Ranch                          |
| Non-melanistic 258 | <i>pardus</i>    | Voi, Coast Province, Kenya                 | -3.3767      | 38.5138   | Tropical and Subtropical Grasslands, Savannas and Shrublands | East African Acacia Savannas              | Photograph | All      | 1911    | National Museum of Natural History USA |
| Non-melanistic 259 | <i>delacouri</i> | Nam Et-Phou Louey, Laos                    | 20.6599      | 103.2908  | Tropical and Subtropical Moist Broadleaf Forests             | North Indochina subtropical moist forests | Photograph | All      | 2009    | Bruce Kekule                           |
| Non-melanistic 260 | <i>delacouri</i> | Plateau Bolovens, Laos                     | 15.3908      | 106.3461  | Tropical and Subtropical Moist Broadleaf Forests             | Annamite Range moist forests              | Photograph | All      | 1932    | American Museum of Natural History USA |
| Non-melanistic 261 | <i>pardus</i>    | Monrovia, Liberia                          | 6.3345       | -10.6443  | Tropical and Subtropical Moist Broadleaf Forests             | Guinean Moist Forests                     | Photograph | All      | no data | American Museum of Natural History USA |
| Non-melanistic 262 | <i>pardus</i>    | Lifupa Game Camp, Malawi                   | -13.0872     | 33.1512   | Tropical and Subtropical Grasslands, Savannas and Shrublands | Southern Miombo woodlands                 | Photograph | All      | no data | Smithsonian Institution                |
| Non-melanistic 263 | <i>pardus</i>    | Lifupa Game Camp, Malawi                   | -13.1053     | 33.1605   | Tropical and Subtropical Grasslands, Savannas and Shrublands | Southern Miombo woodlands                 | Photograph | All      | no data | Smithsonian Institution                |
| Non-melanistic 264 | <i>pardus</i>    | Mboboi, Malawi                             | -13.0286     | 33.9612   | Tropical and Subtropical Grasslands, Savannas and Shrublands | Central Zambesian Miombo woodlands        | Photograph | All      | 1946    | American Museum of Natural History USA |
| Non-melanistic 265 | <i>delacouri</i> | Endau-Rompin National Park, Malaysia       | 6.3561       | 101.3821  | Tropical and Subtropical Moist Broadleaf Forests             | Peninsular Malaysian rain forests         | Photograph | All      | 2003    | Asian Leopard Project                  |
| Non-melanistic 266 | <i>delacouri</i> | Endau-Rompin National Park, Malaysia       | 6.0600       | 101.5340  | Tropical and Subtropical Moist Broadleaf Forests             | Peninsular Malaysian rain forests         | Photograph | All      | 2010    | Bruce Kekule                           |
| Non-melanistic 267 | <i>delacouri</i> | Salween River, Myanmar                     | 20.0657      | 98.4779   | Tropical and Subtropical Moist Broadleaf Forests             | Kayah-Karen/Tenasserim moist forests      | Photograph | All      | 1899    | Bertha Ferras                          |
| Non-melanistic 268 | <i>pardus</i>    | Chiputo, Mocambique                        | -14.8612     | 32.2915   | Tropical and Subtropical Grasslands, Savannas and Shrublands | Southern Miombo woodlands                 | Photograph | All      | no data | American Museum of Natural History USA |
| Non-melanistic 269 | <i>pardus</i>    | Lake Malawi, Mocambique                    | -12.5962     | 34.9996   | Tropical and Subtropical Grasslands, Savannas and Shrublands | Eastern Miombo woodlands                  | Photograph | All      | no data | National Museum of Natural History USA |
| Non-melanistic 270 | <i>pardus</i>    | Niassa, Mocambique                         | -12.1415     | 36.1377   | Tropical and Subtropical Grasslands, Savannas and Shrublands | Eastern Miombo woodlands                  | Photograph | All      | 2013    | Niassa Lion Project                    |
| Non-melanistic 271 | <i>pardus</i>    | Chasie, Karakuwisa, Namibia                | -19.1400     | 20.1400   | Tropical and Subtropical Grasslands, Savannas and Shrublands | Kalahari Acacia-Baikiaea woodlands        | Photograph | All      | 1952    | National Museum of Natural History USA |
| Non-melanistic 272 | <i>pardus</i>    | Chasie, Karakuwisa, Namibia                | -19.1400     | 20.1400   | Tropical and Subtropical Grasslands, Savannas and Shrublands | Kalahari Acacia-Baikiaea woodlands        | Photograph | All      | 1952    | National Museum of Natural History USA |
| Non-melanistic 273 | <i>pardus</i>    | Epukiro, Namibia                           | -21.6196     | 20.0000   | Deserts and Xeric Shrublands                                 | Kalahari xeric savanna                    | Photograph | All      | 2012    | Andrew Stein                           |
| Non-melanistic 274 | <i>pardus</i>    | Erindi Game Reserve, Namibia               | -21.4790     | 16.4574   | Deserts and Xeric Shrublands                                 | Kalahari xeric savanna                    | Photograph | All      | no data | Andrew Stein                           |
| Non-melanistic 275 | <i>pardus</i>    | Erindi Game Reserve, Namibia               | -21.6078     | 16.4067   | Deserts and Xeric Shrublands                                 | Kalahari xeric savanna                    | Photograph | All      | 2010    | Andrew Stein                           |
| Non-melanistic 276 | <i>pardus</i>    | Ettien Reserve, Namibia                    | -20.7896     | 19.9967   | Tropical and Subtropical Grasslands, Savannas and Shrublands | Kalahari Acacia-Baikiaea woodlands        | Photograph | All      | no data | Andrew Stein                           |
| Non-melanistic 277 | <i>pardus</i>    | Ku Game Ranch, Namibia                     | -19.9140     | 16.1918   | Tropical and Subtropical Grasslands, Savannas and Shrublands | Angolan Mopane woodlands                  | Photograph | All      | no data | Ezekiel Fabiano Chimbioputo            |
| Non-melanistic 278 | <i>pardus</i>    | Naukluft Mountains Park, Namibia           | -24.1521     | 16.2544   | Deserts and Xeric Shrublands                                 | Namibian savanna woodlands                | Photograph | All      | 2013    | Duke University                        |
| Non-melanistic 279 | <i>pardus</i>    | Naukluft Mountains Park, Namibia           | -24.1954     | 16.1514   | Deserts and Xeric Shrublands                                 | Namibian savanna woodlands                | Photograph | All      | 2013    | Duke University                        |
| Non-melanistic 280 | <i>pardus</i>    | Okaputa, Namibia                           | -20.0934     | 17.5168   | Tropical and Subtropical Grasslands, Savannas and Shrublands | Kalahari Acacia-Baikiaea woodlands        | Photograph | All      | no data | Andrew Stein                           |
| Non-melanistic 281 | <i>pardus</i>    | Okaputa, Namibia                           | -20.0934     | 17.5168   | Tropical and Subtropical Grasslands, Savannas and Shrublands | Kalahari Acacia-Baikiaea woodlands        | Photograph | All      | no data | Andrew Stein                           |
| Non-melanistic 282 | <i>pardus</i>    | Okaputa, Namibia                           | -20.0934     | 17.5168   | Tropical and Subtropical Grasslands, Savannas and Shrublands | Kalahari Acacia-Baikiaea woodlands        | Photograph | All      | no data | Andrew Stein                           |
| Non-melanistic 283 | <i>pardus</i>    | Okaputa, Namibia                           | -20.0934     | 17.5168   | Tropical and Subtropical Grasslands, Savannas and Shrublands | Kalahari Acacia-Baikiaea woodlands        | Photograph | All      | no data | Andrew Stein                           |
| Non-melanistic 284 | <i>pardus</i>    | Otjinene, Namibia                          | -20.8011     | 20.1926   | Tropical and Subtropical Grasslands, Savannas and Shrublands | Kalahari Acacia-Baikiaea woodlands        | Photograph | All      | 2012    | Andrew Stein                           |
| Non-melanistic 285 | <i>pardus</i>    | Otjiwarongo, Namibia                       | -20.5101     | 16.7498   | Deserts and Xeric Shrublands                                 | Kalahari xeric savanna                    | Photograph | All      | 2009    | Ezekiel Fabiano Chimbioputo            |
| Non-melanistic 286 | <i>pardus</i>    | Otjiwarongo, Namibia                       | -20.4627     | 17.1710   | Deserts and Xeric Shrublands                                 | Kalahari xeric savanna                    | Photograph | All      | 2010    | Ezekiel Fabiano Chimbioputo            |
| Non-melanistic 287 | <i>pardus</i>    | Otjiwarongo, Namibia                       | -20.4630     | 17.1714   | Deserts and Xeric Shrublands                                 | Kalahari xeric savanna                    | Photograph | All      | 2010    | Ezekiel Fabiano Chimbioputo            |
| Non-melanistic 288 | <i>pardus</i>    | Otjiwarongo, Namibia                       | -20.4364     | 17.1139   | Deserts and Xeric Shrublands                                 | Kalahari xeric savanna                    | Photograph | All      | 2010    | Ezekiel Fabiano Chimbioputo            |
| Non-melanistic 289 | <i>pardus</i>    | Otjiwarongo, Namibia                       | -20.3995     | 17.0962   | Deserts and Xeric Shrublands                                 | Kalahari xeric savanna                    | Photograph | All      | 2010    | Ezekiel Fabiano Chimbioputo            |
| Non-melanistic 290 | <i>pardus</i>    | Otjiwarongo, Namibia                       | -20.4582     | 17.0907   | Deserts and Xeric Shrublands                                 | Kalahari xeric savanna                    | Photograph | All      | 2010    | Ezekiel Fabiano Chimbioputo            |
| Non-melanistic 291 | <i>pardus</i>    | Otjiwarongo, Namibia                       | -20.3890     | 17.0827   | Deserts and Xeric Shrublands                                 | Kalahari xeric savanna                    | Photograph | All      | 2010    | Ezekiel Fabiano Chimbioputo            |
| Non-melanistic 292 | <i>pardus</i>    | Otjiwarongo, Namibia                       | -20.4587     | 17.1401   | Deserts and Xeric Shrublands                                 | Kalahari xeric savanna                    | Photograph | All      | 2010    | Ezekiel Fabiano Chimbioputo            |
| Non-melanistic 293 | <i>pardus</i>    | Otjiwarongo, Namibia                       | -20.4674     | 16.9741   | Deserts and Xeric Shrublands                                 | Kalahari xeric savanna                    | Photograph | All      | 2010    | Ezekiel Fabiano Chimbioputo            |
| Non-melanistic 294 | <i>pardus</i>    | Otjiwarongo, Namibia                       | -20.4788     | 17.1425   | Deserts and Xeric Shrublands                                 | Kalahari xeric savanna                    | Photograph | All      | 2011    | Ezekiel Fabiano Chimbioputo            |
| Non-melanistic 295 | <i>pardus</i>    | Otjiwarongo, Namibia                       | -20.4331     | 17.0815   | Deserts and Xeric Shrublands                                 | Kalahari xeric savanna                    | Photograph | All      | 2011    | Ezekiel Fabiano Chimbioputo            |

| Id                 | Subspecies        | Location                                      | Deg. - WGS84 |           | Biome                                                        | Ecoregion                                            | Sample     | Analysis | Year    | Source                                           |
|--------------------|-------------------|-----------------------------------------------|--------------|-----------|--------------------------------------------------------------|------------------------------------------------------|------------|----------|---------|--------------------------------------------------|
|                    |                   |                                               | Latitude     | Longitude |                                                              |                                                      |            |          |         |                                                  |
| Non-melanistic 296 | <i>pardus</i>     | Reitfonten, Namibia                           | -20.8792     | 20.8462   | Tropical and Subtropical Grasslands, Savannas and Shrublands | Kalahari Acacia-Baikiaea woodlands                   | Photograph | All      | 2011    | Smithsonian Institution                          |
| Non-melanistic 297 | <i>pardus</i>     | Reitfonten, Namibia                           | -21.4373     | 20.6209   | Tropical and Subtropical Grasslands, Savannas and Shrublands | Kalahari Acacia-Baikiaea woodlands                   | Photograph | All      | 2011    | Smithsonian Institution                          |
| Non-melanistic 298 | <i>pardus</i>     | Tsumkwe, Namibia                              | -19.7844     | 20.5430   | Tropical and Subtropical Grasslands, Savannas and Shrublands | Kalahari Acacia-Baikiaea woodlands                   | Photograph | All      | 2011    | Smithsonian Institution                          |
| Non-melanistic 299 | <i>pardus</i>     | Waterberg, Namibia                            | -20.4613     | 17.2081   | Deserts and Xeric Shrublands                                 | Kalahari xeric savanna                               | Photograph | All      | no data | Andrew Stein                                     |
| Non-melanistic 300 | <i>pardus</i>     | Waterberg, Namibia                            | -20.4613     | 17.2081   | Deserts and Xeric Shrublands                                 | Kalahari xeric savanna                               | Photograph | All      | no data | Andrew Stein                                     |
| Non-melanistic 301 | <i>pardus</i>     | Waterberg, Namibia                            | -20.4613     | 17.2081   | Deserts and Xeric Shrublands                                 | Kalahari xeric savanna                               | Photograph | All      | no data | Andrew Stein                                     |
| Non-melanistic 302 | <i>pardus</i>     | Waterberg, Namibia                            | -20.4613     | 17.2081   | Deserts and Xeric Shrublands                                 | Kalahari xeric savanna                               | Photograph | All      | no data | Andrew Stein                                     |
| Non-melanistic 303 | <i>pardus</i>     | Waterberg, Namibia                            | -20.4613     | 17.2081   | Deserts and Xeric Shrublands                                 | Kalahari xeric savanna                               | Photograph | All      | no data | Andrew Stein                                     |
| Non-melanistic 304 | <i>fusca</i>      | Bardia National Park, Nepal                   | 28.7941      | 81.1997   | Tropical and Subtropical Moist Broadleaf Forests             | Himalayan subtropical broadleaf forests              | Photograph | All      | no data | Smithsonian Institution                          |
| Non-melanistic 305 | <i>fusca</i>      | Chitwan National Park, Nepal                  | 27.4529      | 84.4404   | Tropical and Subtropical Moist Broadleaf Forests             | Himalayan subtropical broadleaf forests              | Photograph | All      | no data | Michigan State University                        |
| Non-melanistic 306 | <i>fusca</i>      | Pir Lasora National Park, Nepal               | 27.4979      | 84.0197   | Tropical and Subtropical Moist Broadleaf Forests             | Himalayan subtropical broadleaf forests              | Photograph | All      | 2010    | Michigan State University                        |
| Non-melanistic 307 | <i>fusca</i>      | Ghansa, Nepal                                 | 28.7834      | 83.7560   | Temperate Broadleaf and Mixed Forests                        | Western Himalayan broadleaf forests                  | Photograph | All      | no data | Ghimirey 2006                                    |
| Non-melanistic 308 | <i>pardus</i>     | Donga, Nigeria                                | 7.6133       | 10.0462   | Tropical and Subtropical Grasslands, Savannas and Shrublands | Guinean forest-savanna mosaic                        | Photograph | All      | no data | National Geographic Society                      |
| Non-melanistic 309 | <i>pardus</i>     | Niger Delta, Nigeria                          | 5.1980       | 6.3856    | Tropical and Subtropical Moist Broadleaf Forests             | Niger Delta swamp forests                            | Photograph | All      | no data | Ikemeh 2007                                      |
| Non-melanistic 310 | <i>pardus</i>     | Otuau, Nigeria                                | 4.8771       | 6.0880    | Tropical and Subtropical Moist Broadleaf Forests             | Niger Delta swamp forests                            | Photograph | All      | 1961    | National Museum of Natural History USA           |
| Non-melanistic 311 | <i>nimr</i>       | Dofar Mountains, Oman                         | 17.2705      | 53.6453   | Deserts and Xeric Shrublands                                 | Red Sea Nubo-Sindian tropical desert and semi-desert | Photograph | All      | no data | British Exploring Society                        |
| Non-melanistic 312 | <i>nimr</i>       | Jabal Samhan Nature Reserve, Oman             | 17.2712      | 54.8702   | Deserts and Xeric Shrublands                                 | Arabian Highlands woodlands and shrublands           | Photograph | All      | no data | Jane Budd                                        |
| Non-melanistic 313 | <i>nimr</i>       | Jabal Samhan Nature Reserve, Oman             | 17.2246      | 55.1100   | Deserts and Xeric Shrublands                                 | Arabian Highlands woodlands and shrublands           | Photograph | All      | no data | Spalton et al 2006                               |
| Non-melanistic 314 | <i>nimr</i>       | Samhan Nature Reserve, Oman                   | 17.0013      | 54.8161   | Deserts and Xeric Shrublands                                 | Arabian Highlands woodlands and shrublands           | Photograph | All      | no data | Jane Budd                                        |
| Non-melanistic 315 | <i>nimr</i>       | Samhan Nature Reserve, Oman                   | 17.0792      | 54.8472   | Deserts and Xeric Shrublands                                 | Arabian Highlands woodlands and shrublands           | Photograph | All      | no data | Jane Budd                                        |
| Non-melanistic 316 | <i>fusca</i>      | Machiar National Park, Pakistan               | 35.6015      | 74.2158   | Temperate Coniferous Forest                                  | Western Himalayan temperate forests                  | Photograph | All      | 2012    | World Wild Fund                                  |
| Non-melanistic 317 | <i>fusca</i>      | Pir Lasora National Park, Pakistan            | 33.4133      | 74.0126   | Tropical and Subtropical Coniferous Forests                  | Himalayan subtropical pine forests                   | Photograph | All      | no data | World Wild Fund                                  |
| Non-melanistic 318 | <i>fusca</i>      | Pir Lasora National Park, Pakistan            | 33.3329      | 74.0563   | Tropical and Subtropical Coniferous Forests                  | Himalayan subtropical pine forests                   | Photograph | All      | no data | World Wild Fund                                  |
| Non-melanistic 319 | <i>orientalis</i> | Ayandeki, Russia                              | 43.4387      | 131.3109  | Temperate Broadleaf and Mixed Forests                        | Manchurian mixed forests                             | Photograph | All      | no data | World Wild Fund                                  |
| Non-melanistic 320 | <i>orientalis</i> | Kedrovaya Pad Reserve, Russia                 | 43.8189      | 131.5116  | Temperate Broadleaf and Mixed Forests                        | Manchurian mixed forests                             | Photograph | All      | no data | Yury Shibnev                                     |
| Non-melanistic 321 | <i>orientalis</i> | Kedrovaya Pad Reserve, Russia                 | 43.5906      | 131.5544  | Temperate Broadleaf and Mixed Forests                        | Manchurian mixed forests                             | Photograph | All      | no data | Yury Shibnev                                     |
| Non-melanistic 322 | <i>orientalis</i> | Primorsky Krai, Nezhino Hunting Lease, Russia | 43.7012      | 131.7596  | Temperate Broadleaf and Mixed Forests                        | Manchurian mixed forests                             | Photograph | All      | no data | Ekaterina Nicolaeva/Dale Miquelle                |
| Non-melanistic 323 | <i>orientalis</i> | Primorsky Krai, Nezhino Hunting Lease, Russia | 43.7012      | 131.7596  | Temperate Broadleaf and Mixed Forests                        | Manchurian mixed forests                             | Photograph | All      | no data | Ekaterina Nicolaeva/Dale Miquelle                |
| Non-melanistic 324 | <i>orientalis</i> | Primorsky Krai, Nezhino Hunting Lease, Russia | 43.7012      | 131.7596  | Temperate Broadleaf and Mixed Forests                        | Manchurian mixed forests                             | Photograph | All      | no data | Ekaterina Nicolaeva/Dale Miquelle                |
| Non-melanistic 325 | <i>orientalis</i> | Primorsky Krai, Nezhino Hunting Lease, Russia | 43.7012      | 131.7596  | Temperate Broadleaf and Mixed Forests                        | Manchurian mixed forests                             | Photograph | All      | no data | Ekaterina Nicolaeva/Dale Miquelle                |
| Non-melanistic 326 | <i>orientalis</i> | Primorsky Krai, Nezhino Hunting Lease, Russia | 43.3135      | 131.2976  | Temperate Broadleaf and Mixed Forests                        | Manchurian mixed forests                             | Photograph | All      | no data | Ekaterina Nicolaeva/Dale Miquelle                |
| Non-melanistic 327 | <i>orientalis</i> | Primorsky Krai, Nezhino Hunting Lease, Russia | 43.3135      | 131.2976  | Temperate Broadleaf and Mixed Forests                        | Manchurian mixed forests                             | Photograph | All      | no data | Ekaterina Nicolaeva/Dale Miquelle                |
| Non-melanistic 328 | <i>orientalis</i> | Primorsky Krai, Nezhino Hunting Lease, Russia | 43.3135      | 131.2976  | Temperate Broadleaf and Mixed Forests                        | Manchurian mixed forests                             | Photograph | All      | no data | Ekaterina Nicolaeva/Dale Miquelle                |
| Non-melanistic 329 | <i>orientalis</i> | Primorsky Krai, Nezhino Hunting Lease, Russia | 43.3135      | 131.2976  | Temperate Broadleaf and Mixed Forests                        | Manchurian mixed forests                             | Photograph | All      | no data | Ekaterina Nicolaeva/Dale Miquelle                |
| Non-melanistic 330 | <i>orientalis</i> | Primorsky Krai, Nezhino Hunting Lease, Russia | 43.3135      | 131.2976  | Temperate Broadleaf and Mixed Forests                        | Manchurian mixed forests                             | Photograph | All      | no data | Ekaterina Nicolaeva/Dale Miquelle                |
| Non-melanistic 331 | <i>orientalis</i> | Primorsky Krai, Nezhino Hunting Lease, Russia | 43.0242      | 131.1564  | Temperate Broadleaf and Mixed Forests                        | Manchurian mixed forests                             | Photograph | All      | no data | Ekaterina Nicolaeva/Dale Miquelle                |
| Non-melanistic 332 | <i>orientalis</i> | Primorsky Krai, Nezhino Hunting Lease, Russia | 43.0242      | 131.1564  | Temperate Broadleaf and Mixed Forests                        | Manchurian mixed forests                             | Photograph | All      | no data | Ekaterina Nicolaeva/Dale Miquelle                |
| Non-melanistic 333 | <i>orientalis</i> | Primorsky Krai, Nezhino Hunting Lease, Russia | 43.0242      | 131.1564  | Temperate Broadleaf and Mixed Forests                        | Manchurian mixed forests                             | Photograph | All      | no data | Ekaterina Nicolaeva/Dale Miquelle                |
| Non-melanistic 334 | <i>orientalis</i> | Primorsky Krai, Nezhino Hunting Lease, Russia | 43.0242      | 131.1564  | Temperate Broadleaf and Mixed Forests                        | Manchurian mixed forests                             | Photograph | All      | no data | Ekaterina Nicolaeva/Dale Miquelle                |
| Non-melanistic 335 | <i>orientalis</i> | Primorsky Krai, Nezhino Hunting Lease, Russia | 43.0242      | 131.1564  | Temperate Broadleaf and Mixed Forests                        | Manchurian mixed forests                             | Photograph | All      | no data | Ekaterina Nicolaeva/Dale Miquelle                |
| Non-melanistic 336 | <i>orientalis</i> | Primorsky Krai, Nezhino Hunting Lease, Russia | 42.8721      | 131.1602  | Temperate Broadleaf and Mixed Forests                        | Manchurian mixed forests                             | Photograph | All      | no data | Ekaterina Nicolaeva/Dale Miquelle                |
| Non-melanistic 337 | <i>orientalis</i> | Primorsky Krai, Nezhino Hunting Lease, Russia | 42.8721      | 131.1602  | Temperate Broadleaf and Mixed Forests                        | Manchurian mixed forests                             | Photograph | All      | no data | Ekaterina Nicolaeva/Dale Miquelle                |
| Non-melanistic 338 | <i>orientalis</i> | Primorsky Krai, Nezhino Hunting Lease, Russia | 42.8721      | 131.1602  | Temperate Broadleaf and Mixed Forests                        | Manchurian mixed forests                             | Photograph | All      | no data | Ekaterina Nicolaeva/Dale Miquelle                |
| Non-melanistic 339 | <i>orientalis</i> | Primorsky Krai, Nezhino Hunting Lease, Russia | 42.8721      | 131.1602  | Temperate Broadleaf and Mixed Forests                        | Manchurian mixed forests                             | Photograph | All      | no data | Ekaterina Nicolaeva/Dale Miquelle                |
| Non-melanistic 340 | <i>orientalis</i> | Primorsky Krai, Nezhino Hunting Lease, Russia | 42.8721      | 131.1602  | Temperate Broadleaf and Mixed Forests                        | Manchurian mixed forests                             | Photograph | All      | no data | Ekaterina Nicolaeva/Dale Miquelle                |
| Non-melanistic 341 | <i>orientalis</i> | Primorsky Krai, Nezhino Hunting Lease, Russia | 42.8721      | 131.1602  | Temperate Broadleaf and Mixed Forests                        | Manchurian mixed forests                             | Photograph | All      | no data | Ekaterina Nicolaeva/Dale Miquelle                |
| Non-melanistic 342 | <i>orientalis</i> | Primorsky Krai, Nezhino Hunting Lease, Russia | 42.8721      | 131.1602  | Temperate Broadleaf and Mixed Forests                        | Manchurian mixed forests                             | Photograph | All      | no data | Ekaterina Nicolaeva/Dale Miquelle                |
| Non-melanistic 343 | <i>orientalis</i> | Primorsky Krai, Nezhino Hunting Lease, Russia | 42.8094      | 130.7478  | Temperate Broadleaf and Mixed Forests                        | Manchurian mixed forests                             | Photograph | All      | no data | Ekaterina Nicolaeva/Dale Miquelle                |
| Non-melanistic 344 | <i>orientalis</i> | Primorsky Krai, Nezhino Hunting Lease, Russia | 42.8094      | 130.7478  | Temperate Broadleaf and Mixed Forests                        | Manchurian mixed forests                             | Photograph | All      | no data | Ekaterina Nicolaeva/Dale Miquelle                |
| Non-melanistic 345 | <i>orientalis</i> | Primorsky Krai, Nezhino Hunting Lease, Russia | 42.8094      | 130.7478  | Temperate Broadleaf and Mixed Forests                        | Manchurian mixed forests                             | Photograph | All      | no data | Ekaterina Nicolaeva/Dale Miquelle                |
| Non-melanistic 346 | <i>orientalis</i> | Primorsky Krai, Nezhino Hunting Lease, Russia | 42.8094      | 130.7478  | Temperate Broadleaf and Mixed Forests                        | Manchurian mixed forests                             | Photograph | All      | no data | Ekaterina Nicolaeva/Dale Miquelle                |
| Non-melanistic 347 | <i>orientalis</i> | Southwest Primorye, Russia                    | 43.5209      | 131.7363  | Temperate Broadleaf and Mixed Forests                        | Manchurian mixed forests                             | Photograph | All      | 2004    | Wildlife Conservation Society - Alexander Reebin |
| Non-melanistic 348 | <i>orientalis</i> | Southwest Primorye, Russia                    | 43.4308      | 131.5017  | Temperate Broadleaf and Mixed Forests                        | Manchurian mixed forests                             | Photograph | All      | 2007    | Wildlife Conservation Society - Alexander Reebin |
| Non-melanistic 349 | <i>orientalis</i> | Southwest Primorye, Russia                    | 43.4968      | 131.6842  | Temperate Broadleaf and Mixed Forests                        | Manchurian mixed forests                             | Photograph | All      | 2003    | Wildlife Conservation Society - Alexander Reebin |
| Non-melanistic 350 | <i>orientalis</i> | Southwest Primorye, Russia                    | 43.4772      | 131.6761  | Temperate Broadleaf and Mixed Forests                        | Manchurian mixed forests                             | Photograph | All      | no data | Wildlife Conservation Society - Alexander Reebin |
| Non-melanistic 351 | <i>orientalis</i> | Southwest Primorye, Russia                    | 43.4405      | 131.4546  | Temperate Broadleaf and Mixed Forests                        | Manchurian mixed forests                             | Photograph | All      | 2004    | Wildlife Conservation Society - Alexander Reebin |
| Non-melanistic 352 | <i>orientalis</i> | Southwest Primorye, Russia                    | 43.3997      | 131.6481  | Temperate Broadleaf and Mixed Forests                        | Manchurian mixed forests                             | Photograph | All      | 2004    | Wildlife Conservation Society - Alexander Reebin |
| Non-melanistic 353 | <i>orientalis</i> | Southwest Primorye, Russia                    | 43.3997      | 131.6481  | Temperate Broadleaf and Mixed Forests                        | Manchurian mixed forests                             | Photograph | All      | 2004    | Wildlife Conservation Society - Alexander Reebin |
| Non-melanistic 354 | <i>orientalis</i> | Southwest Primorye, Russia                    | 43.3997      | 131.6481  | Temperate Broadleaf and Mixed Forests                        | Manchurian mixed forests                             | Photograph | All      | 2004    | Wildlife Conservation Society - Alexander Reebin |
| Non-melanistic 355 | <i>orientalis</i> | Southwest Primorye, Russia                    | 43.3997      | 131.6481  | Temperate Broadleaf and Mixed Forests                        | Manchurian mixed forests                             | Photograph | All      | 2004    | Wildlife Conservation Society - Alexander Reebin |

| Id                 | Subspecies        | Location                                        | Deg. - WGS84 |           | Biome                                                        | Ecoregion                                    | Sample     | Analysis | Year    | Source                                           |
|--------------------|-------------------|-------------------------------------------------|--------------|-----------|--------------------------------------------------------------|----------------------------------------------|------------|----------|---------|--------------------------------------------------|
|                    |                   |                                                 | Latitude     | Longitude |                                                              |                                              |            |          |         |                                                  |
| Non-melanistic 356 | <i>orientalis</i> | Southwest Primorye, Russia                      | 43.5018      | 131.5278  | Temperate Broadleaf and Mixed Forests                        | Manchurian mixed forests                     | Photograph | All      | 2004    | Wildlife Conservation Society - Alexander Reebin |
| Non-melanistic 357 | <i>orientalis</i> | Southwest Primorye, Russia                      | 43.4375      | 131.7086  | Temperate Broadleaf and Mixed Forests                        | Manchurian mixed forests                     | Photograph | All      | 2001    | Wildlife Conservation Society - Alexander Reebin |
| Non-melanistic 358 | <i>orientalis</i> | Southwest Primorye, Russia                      | 43.4375      | 131.7086  | Temperate Broadleaf and Mixed Forests                        | Manchurian mixed forests                     | Photograph | All      | 2004    | Wildlife Conservation Society - Alexander Reebin |
| Non-melanistic 359 | <i>orientalis</i> | Southwest Primorye, Russia                      | 43.4765      | 131.6034  | Temperate Broadleaf and Mixed Forests                        | Manchurian mixed forests                     | Photograph | All      | 2004    | Wildlife Conservation Society - Alexander Reebin |
| Non-melanistic 360 | <i>orientalis</i> | Southwest Primorye, Russia                      | 43.4765      | 131.6034  | Temperate Broadleaf and Mixed Forests                        | Manchurian mixed forests                     | Photograph | All      | 2007    | Wildlife Conservation Society - Alexander Reebin |
| Non-melanistic 361 | <i>orientalis</i> | Southwest Primorye, Russia                      | 43.5164      | 131.6544  | Temperate Broadleaf and Mixed Forests                        | Manchurian mixed forests                     | Photograph | All      | 2005    | Wildlife Conservation Society - Alexander Reebin |
| Non-melanistic 362 | <i>orientalis</i> | Southwest Primorye, Russia                      | 43.4693      | 131.5529  | Temperate Broadleaf and Mixed Forests                        | Manchurian mixed forests                     | Photograph | All      | 2005    | Wildlife Conservation Society - Alexander Reebin |
| Non-melanistic 363 | <i>orientalis</i> | Southwest Primorye, Russia                      | 43.4821      | 131.5401  | Temperate Broadleaf and Mixed Forests                        | Manchurian mixed forests                     | Photograph | All      | 2005    | Wildlife Conservation Society - Alexander Reebin |
| Non-melanistic 364 | <i>orientalis</i> | Southwest Primorye, Russia                      | 43.4511      | 131.5435  | Temperate Broadleaf and Mixed Forests                        | Manchurian mixed forests                     | Photograph | All      | 2011    | Wildlife Conservation Society - Alexander Reebin |
| Non-melanistic 365 | <i>orientalis</i> | Southwest Primorye, Russia                      | 43.4189      | 131.5842  | Temperate Broadleaf and Mixed Forests                        | Manchurian mixed forests                     | Photograph | All      | 2007    | Wildlife Conservation Society - Alexander Reebin |
| Non-melanistic 366 | <i>orientalis</i> | Southwest Primorye, Russia                      | 43.4096      | 131.4165  | Temperate Broadleaf and Mixed Forests                        | Manchurian mixed forests                     | Photograph | All      | 2011    | Wildlife Conservation Society - Alexander Reebin |
| Non-melanistic 367 | <i>orientalis</i> | Southwest Primorye, Russia                      | 43.4096      | 131.4165  | Temperate Broadleaf and Mixed Forests                        | Manchurian mixed forests                     | Photograph | All      | 2007    | Wildlife Conservation Society - Alexander Reebin |
| Non-melanistic 368 | <i>orientalis</i> | Southwest Primorye, Russia                      | 43.4096      | 131.4165  | Temperate Broadleaf and Mixed Forests                        | Manchurian mixed forests                     | Photograph | All      | 2011    | Wildlife Conservation Society - Alexander Reebin |
| Non-melanistic 369 | <i>orientalis</i> | Southwest Primorye, Russia                      | 43.3791      | 131.5503  | Temperate Broadleaf and Mixed Forests                        | Manchurian mixed forests                     | Photograph | All      | 2007    | Wildlife Conservation Society - Alexander Reebin |
| Non-melanistic 370 | <i>orientalis</i> | Southwest Primorye, Russia                      | 43.5060      | 131.6388  | Temperate Broadleaf and Mixed Forests                        | Manchurian mixed forests                     | Photograph | All      | 2007    | Wildlife Conservation Society - Alexander Reebin |
| Non-melanistic 371 | <i>orientalis</i> | Southwest Primorye, Russia                      | 43.5333      | 131.7144  | Temperate Broadleaf and Mixed Forests                        | Manchurian mixed forests                     | Photograph | All      | 2007    | Wildlife Conservation Society - Alexander Reebin |
| Non-melanistic 372 | <i>orientalis</i> | Southwest Primorye, Russia                      | 43.5333      | 131.7144  | Temperate Broadleaf and Mixed Forests                        | Manchurian mixed forests                     | Photograph | All      | 2007    | Wildlife Conservation Society - Alexander Reebin |
| Non-melanistic 373 | <i>orientalis</i> | Southwest Primorye, Russia                      | 43.5333      | 131.7144  | Temperate Broadleaf and Mixed Forests                        | Manchurian mixed forests                     | Photograph | All      | 2008    | Wildlife Conservation Society - Alexander Reebin |
| Non-melanistic 374 | <i>orientalis</i> | Southwest Primorye, Russia                      | 43.5333      | 131.7144  | Temperate Broadleaf and Mixed Forests                        | Manchurian mixed forests                     | Photograph | All      | 2008    | Wildlife Conservation Society - Alexander Reebin |
| Non-melanistic 375 | <i>orientalis</i> | Southwest Primorye, Russia                      | 43.3238      | 131.5431  | Temperate Broadleaf and Mixed Forests                        | Manchurian mixed forests                     | Photograph | All      | 2008    | Wildlife Conservation Society - Alexander Reebin |
| Non-melanistic 376 | <i>orientalis</i> | Southwest Primorye, Russia                      | 43.3506      | 131.4963  | Temperate Broadleaf and Mixed Forests                        | Manchurian mixed forests                     | Photograph | All      | 2009    | Wildlife Conservation Society - Alexander Reebin |
| Non-melanistic 377 | <i>orientalis</i> | Southwest Primorye, Russia                      | 43.3506      | 131.4963  | Temperate Broadleaf and Mixed Forests                        | Manchurian mixed forests                     | Photograph | All      | 2011    | Wildlife Conservation Society - Alexander Reebin |
| Non-melanistic 378 | <i>orientalis</i> | Southwest Primorye, Russia                      | 43.3506      | 131.4963  | Temperate Broadleaf and Mixed Forests                        | Manchurian mixed forests                     | Photograph | All      | 2010    | Wildlife Conservation Society - Alexander Reebin |
| Non-melanistic 379 | <i>orientalis</i> | Southwest Primorye, Russia                      | 43.3506      | 131.4963  | Temperate Broadleaf and Mixed Forests                        | Manchurian mixed forests                     | Photograph | All      | 2010    | Wildlife Conservation Society - Alexander Reebin |
| Non-melanistic 380 | <i>orientalis</i> | Southwest Primorye, Russia                      | 43.3506      | 131.4963  | Temperate Broadleaf and Mixed Forests                        | Manchurian mixed forests                     | Photograph | All      | 2010    | Wildlife Conservation Society - Alexander Reebin |
| Non-melanistic 381 | <i>orientalis</i> | Southwest Primorye, Russia                      | 43.3506      | 131.4963  | Temperate Broadleaf and Mixed Forests                        | Manchurian mixed forests                     | Photograph | All      | 2011    | Wildlife Conservation Society - Alexander Reebin |
| Non-melanistic 382 | <i>orientalis</i> | Southwest Primorye, Russia                      | 43.3506      | 131.4963  | Temperate Broadleaf and Mixed Forests                        | Manchurian mixed forests                     | Photograph | All      | 2010    | Wildlife Conservation Society - Alexander Reebin |
| Non-melanistic 383 | <i>orientalis</i> | Southwest Primorye, Russia                      | 43.3506      | 131.4963  | Temperate Broadleaf and Mixed Forests                        | Manchurian mixed forests                     | Photograph | All      | 2011    | Wildlife Conservation Society - Alexander Reebin |
| Non-melanistic 384 | <i>orientalis</i> | Southwest Primorye, Russia                      | 43.3506      | 131.4963  | Temperate Broadleaf and Mixed Forests                        | Manchurian mixed forests                     | Photograph | All      | 2011    | Wildlife Conservation Society - Alexander Reebin |
| Non-melanistic 385 | <i>orientalis</i> | Southwest Primorye, Russia                      | 43.3506      | 131.4963  | Temperate Broadleaf and Mixed Forests                        | Manchurian mixed forests                     | Photograph | All      | 2011    | Wildlife Conservation Society - Alexander Reebin |
| Non-melanistic 386 | <i>orientalis</i> | Southwest Primorye, Russia                      | 43.4439      | 131.5999  | Temperate Broadleaf and Mixed Forests                        | Manchurian mixed forests                     | Photograph | All      | 2011    | Wildlife Conservation Society - Alexander Reebin |
| Non-melanistic 387 | <i>orientalis</i> | Southwest Primorye, Russia                      | 43.4439      | 131.5999  | Temperate Broadleaf and Mixed Forests                        | Manchurian mixed forests                     | Photograph | All      | 2011    | Wildlife Conservation Society - Alexander Reebin |
| Non-melanistic 388 | <i>orientalis</i> | Ussuri, Nicol'sk, Russia                        | 43.8230      | 132.0324  | Tundra                                                       | Suiphun-Khanka meadows and forest meadows    | Photograph | All      | 1930    | American Museum of Natural History USA           |
| Non-melanistic 389 | <i>orientalis</i> | Ussuri, Okransk, Russia                         | 43.8283      | 131.8699  | Tundra                                                       | Suiphun-Khanka meadows and forest meadows    | Photograph | All      | 1930    | American Museum of Natural History USA           |
| Non-melanistic 390 | <i>pardus</i>     | Kigali, Rwanda                                  | -1.9764      | 30.0001   | Tropical and Subtropical Grasslands, Savannas and Shrublands | Victoria Basin forest-savanna mosaic         | Photograph | All      | no data | Smithsonian Institution                          |
| Non-melanistic 391 | <i>pardus</i>     | Agulhas Plain Great Hermanus Area, South Africa | -34.6572     | 19.7481   | Mediterranean Forests, Woodlands, and Scrub                  | Lowland fynbos and renosterveld              | Photograph | All      | 2012    | Landmark Foundation                              |
| Non-melanistic 392 | <i>pardus</i>     | Agulhas Plain Great Hermanus Area, South Africa | -34.6418     | 19.7119   | Mediterranean Forests, Woodlands, and Scrub                  | Lowland fynbos and renosterveld              | Photograph | All      | 2012    | Landmark Foundation                              |
| Non-melanistic 393 | <i>pardus</i>     | Cederberg Mountains, Western Cape, South Africa | -32.2916     | 19.4120   | Deserts and Xeric Shrublands                                 | Namib-Karoo-Kaokoveld Deserts and Shrublands | Photograph | All      | 2010    | Guy Balme                                        |
| Non-melanistic 394 | <i>pardus</i>     | Cederberg Mountains, Western Cape, South Africa | -32.3383     | 19.1853   | Mediterranean Forests, Woodlands, and Scrub                  | Montane fynbos and renosterveld              | Photograph | All      | no data | Guy Balme                                        |
| Non-melanistic 395 | <i>pardus</i>     | Franschhoek La Motte Hiking Trail, South Africa | -33.9428     | 19.1925   | Mediterranean Forests, Woodlands, and Scrub                  | Montane fynbos and renosterveld              | Photograph | All      | 2011    | Cape Leopard Trust                               |
| Non-melanistic 396 | <i>pardus</i>     | Franschhoek La Motte Hiking Trail, South Africa | -33.9687     | 19.2022   | Mediterranean Forests, Woodlands, and Scrub                  | Montane fynbos and renosterveld              | Photograph | All      | 2011    | Cape Leopard Trust                               |
| Non-melanistic 397 | <i>pardus</i>     | Hoedspruit Game Reserve, South Africa           | -24.1221     | 31.1049   | Tropical and Subtropical Grasslands, Savannas and Shrublands | Zambeian and Mopane woodlands                | Photograph | All      | no data | Guy Balme                                        |
| Non-melanistic 398 | <i>pardus</i>     | Karataara, South Africa                         | -33.9502     | 22.3380   | Mediterranean Forests, Woodlands, and Scrub                  | Fynbos                                       | Photograph | All      | 2013    | Brackzowski & Watson 2013                        |
| Non-melanistic 399 | <i>pardus</i>     | Karataara, South Africa                         | -33.8570     | 22.2120   | Mediterranean Forests, Woodlands, and Scrub                  | Fynbos                                       | Photograph | All      | 2013    | Brackzowski & Watson 2013                        |
| Non-melanistic 400 | <i>pardus</i>     | Karongwe Reserve, South Africa                  | -24.5092     | 30.5079   | Montane Grasslands and Shrublands                            | Drakensberg Montane Woodlands and Grasslands | Photograph | All      | no data | Karongwe Reserve Group                           |
| Non-melanistic 401 | <i>pardus</i>     | Kruger National Park, South Africa              | -24.5210     | 31.2337   | Tropical and Subtropical Grasslands, Savannas and Shrublands | Zambeian and Mopane woodlands                | Photograph | All      | 2013    | Eduardo Eizirik                                  |
| Non-melanistic 402 | <i>pardus</i>     | Kruger National Park, South Africa              | -23.6331     | 30.6962   | Tropical and Subtropical Grasslands, Savannas and Shrublands | Zambeian and Mopane woodlands                | Photograph | All      | 2012    | Daniel Rocha                                     |
| Non-melanistic 403 | <i>pardus</i>     | Kruger National Park, South Africa              | -22.8847     | 31.3549   | Tropical and Subtropical Grasslands, Savannas and Shrublands | Zambeian and Mopane woodlands                | Photograph | All      | no data | Guy Balme                                        |
| Non-melanistic 404 | <i>pardus</i>     | Kudu Game Ranch, South Africa                   | -24.7933     | 30.5083   | Montane Grasslands and Shrublands                            | Drakensberg Montane Woodlands and Grasslands | Photograph | All      | no data | Conservation International                       |
| Non-melanistic 405 | <i>pardus</i>     | KwaZulu-Natal, South Africa                     | -28.4606     | 30.6808   | Montane Grasslands and Shrublands                            | Drakensberg Montane Woodlands and Grasslands | Photograph | All      | no data | Conservation International                       |
| Non-melanistic 406 | <i>pardus</i>     | KwaZulu-Natal, South Africa                     | -28.4766     | 30.7523   | Montane Grasslands and Shrublands                            | Drakensberg Montane Woodlands and Grasslands | Photograph | All      | no data | Conservation International                       |
| Non-melanistic 407 | <i>pardus</i>     | Leap Vineyards, South Africa                    | -33.9187     | 19.6263   | Deserts and Xeric Shrublands                                 | Namib-Karoo-Kaokoveld Deserts and Shrublands | Photograph | All      | 2013    | Cape Leopard Trust                               |
| Non-melanistic 408 | <i>pardus</i>     | Leap Vineyards, South Africa                    | -33.9525     | 19.6478   | Deserts and Xeric Shrublands                                 | Namib-Karoo-Kaokoveld Deserts and Shrublands | Photograph | All      | 2010    | Cape Leopard Trust                               |
| Non-melanistic 409 | <i>pardus</i>     | Letaba, South Africa                            | -23.6260     | 31.5994   | Tropical and Subtropical Grasslands, Savannas and Shrublands | Zambeian and Mopane woodlands                | Photograph | All      | 2010    | Michelle Altenkirk                               |
| Non-melanistic 410 | <i>pardus</i>     | Limpopo, South Africa                           | -22.5536     | 30.9343   | Tropical and Subtropical Grasslands, Savannas and Shrublands | Southern Africa bushveld                     | Photograph | All      | 2004    | Conservation International                       |
| Non-melanistic 411 | <i>pardus</i>     | Limpopo Waterberg Area, South Africa            | -22.1575     | 29.6163   | Tropical and Subtropical Grasslands, Savannas and Shrublands | Zambeian and Mopane woodlands                | Photograph | All      | no data | Andrew Stein                                     |
| Non-melanistic 412 | <i>pardus</i>     | Loskop Dam Protected Area, South Africa         | -25.4369     | 29.2630   | Tropical and Subtropical Grasslands, Savannas and Shrublands | Southern Africa bushveld                     | Photograph | All      | 2004    | Guy Balme                                        |
| Non-melanistic 413 | <i>pardus</i>     | Lydenburg, South Africa                         | -24.8234     | 30.8106   | Montane Grasslands and Shrublands                            | Drakensberg Montane Woodlands and Grasslands | Photograph | All      | no data | Guy Balme                                        |
| Non-melanistic 414 | <i>pardus</i>     | Lydenburg, South Africa                         | -24.6917     | 30.7609   | Montane Grasslands and Shrublands                            | Drakensberg Montane Woodlands and Grasslands | Photograph | All      | 2011    | Guy Balme                                        |
| Non-melanistic 415 | <i>pardus</i>     | Lydenburg, South Africa                         | -24.8012     | 30.7291   | Montane Grasslands and Shrublands                            | Drakensberg Montane Woodlands and Grasslands | Photograph | All      | 2010    | Sharon Hammond                                   |
| Non-melanistic 416 | <i>pardus</i>     | Lydenburg, South Africa                         | -24.8079     | 30.6673   | Montane Grasslands and Shrublands                            | Drakensberg Montane Woodlands and Grasslands | Photograph | All      | 2010    | Sharon Hammond                                   |



| Id                 | Subspecies    | Location                                          | Deg. - WGS84 |           | Biome                                                        | Ecoregion                                    | Sample     | Analysis | Year    | Source                                 |
|--------------------|---------------|---------------------------------------------------|--------------|-----------|--------------------------------------------------------------|----------------------------------------------|------------|----------|---------|----------------------------------------|
|                    |               |                                                   | Latitude     | Longitude |                                                              |                                              |            |          |         |                                        |
| Non-melanistic 417 | <i>pardus</i> | Lydenburg, South Africa                           | -24.6807     | 30.8312   | Montane Grasslands and Shrublands                            | Drakensberg Montane Woodlands and Grasslands | Photograph | All      | 2011    | Sharon Hammond                         |
| Non-melanistic 418 | <i>pardus</i> | Lydenburg Leopard Camp, South Africa              | -24.9668     | 30.3398   | Montane Grasslands and Shrublands                            | Drakensberg Montane Woodlands and Grasslands | Photograph | All      | 2011    | Daniel Rocha                           |
| Non-melanistic 419 | <i>pardus</i> | Lydenburg Leopard Camp, South Africa              | -25.0000     | 30.7428   | Montane Grasslands and Shrublands                            | Drakensberg Montane Woodlands and Grasslands | Photograph | All      | no data | Daniel Rocha                           |
| Non-melanistic 420 | <i>pardus</i> | Mkhuze Game Reserve, South Africa                 | -27.8100     | 32.0030   | Montane Grasslands and Shrublands                            | Drakensberg Montane Woodlands and Grasslands | Photograph | All      | no data | Guy Balme                              |
| Non-melanistic 421 | <i>pardus</i> | Mkhuze Game Reserve, South Africa                 | -27.7886     | 31.8152   | Montane Grasslands and Shrublands                            | Drakensberg Montane Woodlands and Grasslands | Photograph | All      | 2008    | Smithsonian Institution                |
| Non-melanistic 422 | <i>pardus</i> | Mpumalanga, South Africa                          | -25.7211     | 31.6606   | Tropical and Subtropical Grasslands, Savannas and Shrublands | Zambeian and Mopane woodlands                | Photograph | All      | 2011    | Michelle Altenkirk                     |
| Non-melanistic 423 | <i>pardus</i> | Munyawana Leopard Project, South Africa           | -27.7829     | 32.0600   | Montane Grasslands and Shrublands                            | Drakensberg Montane Woodlands and Grasslands | Photograph | All      | no data | Guy Balme                              |
| Non-melanistic 424 | <i>pardus</i> | Phinda Private Game Reserve, South Africa         | -27.8846     | 31.9637   | Montane Grasslands and Shrublands                            | Drakensberg Montane Woodlands and Grasslands | Photograph | All      | no data | Panthera                               |
| Non-melanistic 425 | <i>pardus</i> | Riversdale, Western Cape, South Africa            | -34.2139     | 21.1682   | Mediterranean Forests, Woodlands, and Scrub                  | Fynbos                                       | Photograph | All      | 2011    | Landmark Foundation                    |
| Non-melanistic 426 | <i>pardus</i> | Skukuza Road, South Africa                        | -24.9919     | 31.6263   | Tropical and Subtropical Grasslands, Savannas and Shrublands | Zambeian and Mopane woodlands                | Photograph | All      | no data | Guy Balme                              |
| Non-melanistic 427 | <i>pardus</i> | Somkhanda Game Reserve, South Africa              | -27.7108     | 31.9462   | Montane Grasslands and Shrublands                            | Drakensberg Montane Woodlands and Grasslands | Photograph | All      | no data | Panthera                               |
| Non-melanistic 428 | <i>pardus</i> | Somkhanda Game Reserve, South Africa              | -27.7063     | 31.9791   | Montane Grasslands and Shrublands                            | Drakensberg Montane Woodlands and Grasslands | Photograph | All      | no data | Panthera                               |
| Non-melanistic 429 | <i>pardus</i> | Somkhanda Game Reserve, South Africa              | -27.7361     | 31.9650   | Montane Grasslands and Shrublands                            | Drakensberg Montane Woodlands and Grasslands | Photograph | All      | no data | Panthera                               |
| Non-melanistic 430 | <i>pardus</i> | Somkhanda Game Reserve, South Africa              | -27.8122     | 31.9274   | Montane Grasslands and Shrublands                            | Drakensberg Montane Woodlands and Grasslands | Photograph | All      | no data | Panthera                               |
| Non-melanistic 431 | <i>pardus</i> | Steenkampsberg Mountains, Lydenburg, South Africa | -25.2164     | 30.5472   | Montane Grasslands and Shrublands                            | Drakensberg Montane Woodlands and Grasslands | Photograph | All      | 2010    | Panthera                               |
| Non-melanistic 432 | <i>pardus</i> | Swartberg Area, South Africa                      | -30.1610     | 29.2539   | Montane Grasslands and Shrublands                            | Drakensberg Montane Woodlands and Grasslands | Photograph | All      | no data | Wildlife Conservation Society          |
| Non-melanistic 433 | <i>pardus</i> | Thaba Tholo Wilderness Reserve, South Africa      | -24.9169     | 30.4675   | Montane Grasslands and Shrublands                            | Drakensberg Montane Woodlands and Grasslands | Photograph | All      | no data | TTWR                                   |
| Non-melanistic 434 | <i>pardus</i> | Thaba Tholo Wilderness Reserve, South Africa      | -24.8565     | 30.5184   | Montane Grasslands and Shrublands                            | Drakensberg Montane Woodlands and Grasslands | Photograph | All      | 2012    | TTWR                                   |
| Non-melanistic 435 | <i>pardus</i> | Thaba Tholo Wilderness Reserve, South Africa      | -24.8855     | 30.5195   | Montane Grasslands and Shrublands                            | Drakensberg Montane Woodlands and Grasslands | Photograph | All      | 2012    | TTWR                                   |
| Non-melanistic 436 | <i>pardus</i> | Thaba Tholo Wilderness Reserve, South Africa      | -24.8700     | 30.4386   | Montane Grasslands and Shrublands                            | Drakensberg Montane Woodlands and Grasslands | Photograph | All      | no data | TTWR                                   |
| Non-melanistic 437 | <i>pardus</i> | Thaba Tholo Wilderness Reserve, South Africa      | -24.6122     | 30.4586   | Montane Grasslands and Shrublands                            | Drakensberg Montane Woodlands and Grasslands | Photograph | All      | 2011    | TTWR                                   |
| Non-melanistic 438 | <i>pardus</i> | Thaba Tholo Wilderness Reserve, South Africa      | -24.6237     | 30.3404   | Tropical and Subtropical Grasslands, Savannas and Shrublands | Southern Africa bushveld                     | Photograph | All      | 2012    | TTWR                                   |
| Non-melanistic 439 | <i>pardus</i> | Thaba Game Reserve, South Africa                  | -28.4257     | 30.6239   | Montane Grasslands and Shrublands                            | Drakensberg Montane Woodlands and Grasslands | Photograph | All      | no data | Panthera                               |
| Non-melanistic 440 | <i>pardus</i> | Wemmershoek, South Africa                         | -33.7523     | 19.2081   | Mediterranean Forests, Woodlands, and Scrub                  | Fynbos                                       | Photograph | All      | 2011    | Cape Leopard Trust                     |
| Non-melanistic 441 | <i>pardus</i> | Wemmershoek, South Africa                         | -33.7523     | 19.2081   | Mediterranean Forests, Woodlands, and Scrub                  | Fynbos                                       | Photograph | All      | 2010    | Cape Leopard Trust                     |
| Non-melanistic 442 | <i>pardus</i> | Wemmershoek, South Africa                         | -33.7537     | 19.2903   | Mediterranean Forests, Woodlands, and Scrub                  | Fynbos                                       | Photograph | All      | 2011    | Cape Leopard Trust                     |
| Non-melanistic 443 | <i>pardus</i> | Wemmershoek, South Africa                         | -33.7895     | 19.2485   | Mediterranean Forests, Woodlands, and Scrub                  | Fynbos                                       | Photograph | All      | 2011    | Cape Leopard Trust                     |
| Non-melanistic 444 | <i>pardus</i> | Wemmershoek Mountains, South Africa               | -33.7281     | 19.3583   | Mediterranean Forests, Woodlands, and Scrub                  | Fynbos                                       | Photograph | All      | 2010    | Cape Leopard Trust                     |
| Non-melanistic 445 | <i>kotiya</i> | Agrapatana, Sri Lanka                             | 6.8015       | 80.6216   | Tropical and Subtropical Moist Broadleaf Forests             | Sri Lankan moist forest                      | Photograph | All      | no data | Andrew Kittle                          |
| Non-melanistic 446 | <i>kotiya</i> | Colombo, Western Province, Sri Lanka              | 6.9373       | 79.8917   | Tropical and Subtropical Moist Broadleaf Forests             | Sri Lankan moist forest                      | Photograph | All      | 1908    | National Museum of Natural History USA |
| Non-melanistic 447 | <i>kotiya</i> | Vavuniya Forest, Sri Lanka                        | 8.8836       | 80.3568   | Tropical and Subtropical Dry Broadleaf Forests               | Sri Lanka dry-zone dry evergreen forests     | Photograph | All      | 2004    | Watson & Kittle 2004                   |
| Non-melanistic 448 | <i>kotiya</i> | Dunumadalawa Forest, Sri Lanka                    | 7.2034       | 80.6151   | Tropical and Subtropical Moist Broadleaf Forests             | Sri Lankan moist forest                      | Photograph | All      | no data | Andrew Kittle                          |
| Non-melanistic 449 | <i>kotiya</i> | Hantane, Kandy District, Sri Lanka                | 7.2709       | 80.6422   | Tropical and Subtropical Moist Broadleaf Forests             | Sri Lankan moist forest                      | Photograph | All      | no data | Andrew Kittle                          |
| Non-melanistic 450 | <i>kotiya</i> | Hantane, Kandy District, Sri Lanka                | 7.2553       | 80.6325   | Tropical and Subtropical Moist Broadleaf Forests             | Sri Lankan moist forest                      | Photograph | All      | no data | Andrew Kittle                          |
| Non-melanistic 451 | <i>kotiya</i> | Kantalai, Sri Lanka                               | 8.3076       | 80.8441   | Tropical and Subtropical Dry Broadleaf Forests               | Sri Lanka dry-zone dry evergreen forests     | Photograph | All      | no data | Watson & Kittle 2004                   |
| Non-melanistic 452 | <i>kotiya</i> | Nuwara Eliya, Sri Lanka                           | 7.0260       | 80.7864   | Tropical and Subtropical Moist Broadleaf Forests             | Sri Lankan moist forest                      | Photograph | All      | 2013    | Smithsonian Institution                |
| Non-melanistic 453 | <i>kotiya</i> | Wasgamuwa National Park, Sri Lanka                | 7.6389       | 80.9393   | Tropical and Subtropical Dry Broadleaf Forests               | Sri Lanka dry-zone dry evergreen forests     | Photograph | All      | no data | Andrew Kittle                          |
| Non-melanistic 454 | <i>kotiya</i> | Yala National Park, Sri Lanka                     | 6.4632       | 81.3839   | Tropical and Subtropical Dry Broadleaf Forests               | Sri Lanka dry-zone dry evergreen forests     | Photograph | All      | no data | Andrew Kittle                          |
| Non-melanistic 455 | <i>kotiya</i> | Yala National Park, Sri Lanka                     | 6.4632       | 81.3839   | Tropical and Subtropical Dry Broadleaf Forests               | Sri Lanka dry-zone dry evergreen forests     | Photograph | All      | no data | Andrew Kittle                          |
| Non-melanistic 456 | <i>kotiya</i> | Yala National Park, Sri Lanka                     | 6.4644       | 81.3266   | Tropical and Subtropical Dry Broadleaf Forests               | Sri Lanka dry-zone dry evergreen forests     | Photograph | All      | no data | Andrew Kittle                          |
| Non-melanistic 457 | <i>kotiya</i> | Yala National Park, Sri Lanka                     | 6.5198       | 81.4115   | Tropical and Subtropical Dry Broadleaf Forests               | Sri Lanka dry-zone dry evergreen forests     | Photograph | All      | no data | Andrew Kittle                          |
| Non-melanistic 458 | <i>kotiya</i> | Yala National Park, Sri Lanka                     | 6.5303       | 81.4220   | Tropical and Subtropical Dry Broadleaf Forests               | Sri Lanka dry-zone dry evergreen forests     | Photograph | All      | no data | Andrew Kittle                          |
| Non-melanistic 459 | <i>kotiya</i> | Yala National Park, Sri Lanka                     | 6.5079       | 81.4753   | Tropical and Subtropical Dry Broadleaf Forests               | Sri Lanka dry-zone dry evergreen forests     | Photograph | All      | no data | Andrew Kittle                          |
| Non-melanistic 460 | <i>kotiya</i> | Yala National Park, Sri Lanka                     | 6.4714       | 81.4582   | Tropical and Subtropical Dry Broadleaf Forests               | Sri Lanka dry-zone dry evergreen forests     | Photograph | All      | no data | Andrew Kittle                          |
| Non-melanistic 461 | <i>kotiya</i> | Yala National Park, Sri Lanka                     | 6.4813       | 81.5338   | Tropical and Subtropical Dry Broadleaf Forests               | Sri Lanka dry-zone dry evergreen forests     | Photograph | All      | no data | Andrew Kittle                          |
| Non-melanistic 462 | <i>kotiya</i> | Yala National Park, Sri Lanka                     | 6.4686       | 81.5292   | Tropical and Subtropical Dry Broadleaf Forests               | Sri Lanka dry-zone dry evergreen forests     | Photograph | All      | no data | Andrew Kittle                          |
| Non-melanistic 463 | <i>kotiya</i> | Yala National Park, Sri Lanka                     | 6.4785       | 81.5206   | Tropical and Subtropical Dry Broadleaf Forests               | Sri Lanka dry-zone dry evergreen forests     | Photograph | All      | no data | Andrew Kittle                          |
| Non-melanistic 464 | <i>kotiya</i> | Yala National Park, Sri Lanka                     | 6.4112       | 81.4706   | Tropical and Subtropical Dry Broadleaf Forests               | Sri Lanka dry-zone dry evergreen forests     | Photograph | All      | no data | Andrew Kittle                          |
| Non-melanistic 465 | <i>kotiya</i> | Yala National Park, Sri Lanka                     | 6.4077       | 81.4818   | Tropical and Subtropical Dry Broadleaf Forests               | Sri Lanka dry-zone dry evergreen forests     | Photograph | All      | no data | Andrew Kittle                          |
| Non-melanistic 466 | <i>kotiya</i> | Yala National Park, Sri Lanka                     | 6.4231       | 81.4825   | Tropical and Subtropical Dry Broadleaf Forests               | Sri Lanka dry-zone dry evergreen forests     | Photograph | All      | no data | Andrew Kittle                          |
| Non-melanistic 467 | <i>kotiya</i> | Yala National Park, Sri Lanka                     | 6.4239       | 81.4812   | Tropical and Subtropical Dry Broadleaf Forests               | Sri Lanka dry-zone dry evergreen forests     | Photograph | All      | no data | Andrew Kittle                          |
| Non-melanistic 468 | <i>kotiya</i> | Yala National Park, Sri Lanka                     | 6.4364       | 81.5556   | Tropical and Subtropical Dry Broadleaf Forests               | Sri Lanka dry-zone dry evergreen forests     | Photograph | All      | no data | Andrew Kittle                          |
| Non-melanistic 469 | <i>kotiya</i> | Yala National Park, Sri Lanka                     | 6.4077       | 81.5530   | Tropical and Subtropical Dry Broadleaf Forests               | Sri Lanka dry-zone dry evergreen forests     | Photograph | All      | no data | Andrew Kittle                          |
| Non-melanistic 470 | <i>pardus</i> | El Dueim, Ash Shamaliyah, Sudan                   | 14.0298      | 32.2618   | Tropical and Subtropical Grasslands, Savannas and Shrublands | Sahelian Acacia savanna                      | Photograph | All      | 1910    | National Museum of Natural History USA |
| Non-melanistic 471 | <i>pardus</i> | Nimule National Park, Sudan                       | 3.6133       | 32.1361   | Tropical and Subtropical Grasslands, Savannas and Shrublands | East Sudanian savanna                        | Photograph | All      | 1962    | American Museum of Natural History USA |
| Non-melanistic 472 | <i>pardus</i> | Serengeti Plains, Tanzania                        | -2.1623      | 34.4294   | Tropical and Subtropical Grasslands, Savannas and Shrublands | East African Acacia Savannas                 | Photograph | All      | no data | American Museum of Natural History USA |
| Non-melanistic 473 | <i>pardus</i> | Tanganyika, Rungwe, Tanzania                      | -5.4804      | 29.9287   | Tropical and Subtropical Grasslands, Savannas and Shrublands | Central Zambeian Miombo woodlands            | Photograph | All      | 1929    | American Museum of Natural History USA |
| Non-melanistic 474 | <i>pardus</i> | Tanganyika, Rungwe, Tanzania                      | -5.7615      | 30.3734   | Tropical and Subtropical Grasslands, Savannas and Shrublands | Central Zambeian Miombo woodlands            | Photograph | All      | 1929    | American Museum of Natural History USA |
| Non-melanistic 475 | <i>pardus</i> | Tanganyika, Rungwe, Tanzania                      | -6.1077      | 30.4335   | Tropical and Subtropical Grasslands, Savannas and Shrublands | Central Zambeian Miombo woodlands            | Photograph | All      | 1929    | American Museum of Natural History USA |
| Non-melanistic 476 | <i>pardus</i> | Serengeti National Park, Tanzania                 | -2.5763      | 34.3123   | Tropical and Subtropical Grasslands, Savannas and Shrublands | East African Acacia Savannas                 | Photograph | All      | no data | National Geographic Society            |
| Non-melanistic 477 | <i>pardus</i> | Serengeti National Park, Tanzania                 | -2.4335      | 34.5247   | Tropical and Subtropical Grasslands, Savannas and Shrublands | East African Acacia Savannas                 | Photograph | All      | no data | National Geographic Society            |

| Id                 | Subspecies       | Location                                       | Deg. - WGS84 |           | Biome                                                        | Ecoregion                                         | Sample     | Analysis | Year    | Source                                 |
|--------------------|------------------|------------------------------------------------|--------------|-----------|--------------------------------------------------------------|---------------------------------------------------|------------|----------|---------|----------------------------------------|
|                    |                  |                                                | Latitude     | Longitude |                                                              |                                                   |            |          |         |                                        |
| Non-melanistic 478 | <i>pardus</i>    | Udzungwa Benjamin Drummond Mountains, Tanzania | -7.7762      | 36.6822   | Tropical and Subtropical Moist Broadleaf Forests             | Eastern Arc Montane Forests                       | Photograph | All      | 2011    | Wildlife Conservation Society          |
| Non-melanistic 479 | <i>pardus</i>    | Zanzibar, Tanzania                             | -6.0133      | 39.2655   | Tropical and Subtropical Moist Broadleaf Forests             | Northern Zanzibar-Inhambane coastal forest mosaic | Photograph | Filtered | 1923    | Zanzibar Museum                        |
| Non-melanistic 480 | <i>pardus</i>    | Zanzibar, Tanzania                             | -5.9007      | 39.3223   | Tropical and Subtropical Moist Broadleaf Forests             | Northern Zanzibar-Inhambane coastal forest mosaic | Photograph | Filtered | 1924    | Zanzibar Museum                        |
| Non-melanistic 481 | <i>pardus</i>    | Zanzibar, Tanzania                             | -5.9603      | 39.3396   | Tropical and Subtropical Moist Broadleaf Forests             | Northern Zanzibar-Inhambane coastal forest mosaic | Photograph | Filtered | 1924    | Zanzibar Museum                        |
| Non-melanistic 482 | <i>delacouri</i> | Huai Kha Khaeng Wildlife Sanctuary, Thailand   | 15.8022      | 99.7023   | Tropical and Subtropical Dry Broadleaf Forests               | Indochina dry forests                             | Photograph | All      | 2009    | Kae Kawanishi                          |
| Non-melanistic 483 | <i>delacouri</i> | Huai Kha Khaeng Wildlife Sanctuary, Thailand   | 15.4968      | 99.6261   | Tropical and Subtropical Dry Broadleaf Forests               | Indochina dry forests                             | Photograph | All      | 2009    | Kae Kawanishi                          |
| Non-melanistic 484 | <i>delacouri</i> | Huai Kha Khaeng Wildlife Sanctuary, Thailand   | 15.2545      | 98.7483   | Tropical and Subtropical Moist Broadleaf Forests             | Kayah-Karen/Tenasserim moist forests              | Photograph | All      | 2012    | Bruce Kekule                           |
| Non-melanistic 485 | <i>delacouri</i> | Huai Kha Khaeng Wildlife Sanctuary, Thailand   | 14.7850      | 99.2517   | Tropical and Subtropical Moist Broadleaf Forests             | Kayah-Karen/Tenasserim moist forests              | Photograph | All      | 2012    | Bruce Kekule                           |
| Non-melanistic 486 | <i>delacouri</i> | Huai Kha Khaeng Wildlife Sanctuary, Thailand   | 14.7850      | 99.2517   | Tropical and Subtropical Moist Broadleaf Forests             | Kayah-Karen/Tenasserim moist forests              | Photograph | All      | no data | Bruce Kekule                           |
| Non-melanistic 487 | <i>delacouri</i> | Huai Kha Khaeng Wildlife Sanctuary, Thailand   | 15.5370      | 99.1422   | Tropical and Subtropical Moist Broadleaf Forests             | Kayah-Karen/Tenasserim moist forests              | Photograph | All      | 2013    | Bruce Kekule                           |
| Non-melanistic 488 | <i>delacouri</i> | Huai Kha Khaeng Wildlife Sanctuary, Thailand   | 16.0221      | 98.6581   | Tropical and Subtropical Moist Broadleaf Forests             | Kayah-Karen/Tenasserim moist forests              | Photograph | All      | 2013    | Bruce Kekule                           |
| Non-melanistic 489 | <i>delacouri</i> | Huai Kha Khaeng Wildlife Sanctuary, Thailand   | 15.5751      | 99.1429   | Tropical and Subtropical Moist Broadleaf Forests             | Kayah-Karen/Tenasserim moist forests              | Photograph | All      | 2012    | Wildlife Conservation Society          |
| Non-melanistic 490 | <i>delacouri</i> | Huai Kha Khaeng Wildlife Sanctuary, Thailand   | 15.0925      | 98.9792   | Tropical and Subtropical Moist Broadleaf Forests             | Kayah-Karen/Tenasserim moist forests              | Photograph | All      | 2012    | Wildlife Conservation Society          |
| Non-melanistic 491 | <i>delacouri</i> | Huai Kha Khaeng Wildlife Sanctuary, Thailand   | 14.7990      | 98.9247   | Tropical and Subtropical Moist Broadleaf Forests             | Kayah-Karen/Tenasserim moist forests              | Photograph | All      | 2012    | Wildlife Conservation Society          |
| Non-melanistic 492 | <i>delacouri</i> | Huai Kha Khaeng Wildlife Sanctuary, Thailand   | 14.8046      | 98.5320   | Tropical and Subtropical Moist Broadleaf Forests             | Kayah-Karen/Tenasserim moist forests              | Photograph | All      | 2013    | Wildlife Conservation Society          |
| Non-melanistic 493 | <i>delacouri</i> | Huai Kha Khaeng Wildlife Sanctuary, Thailand   | 14.3872      | 99.2542   | Tropical and Subtropical Moist Broadleaf Forests             | Kayah-Karen/Tenasserim moist forests              | Photograph | All      | 2013    | Wildlife Conservation Society          |
| Non-melanistic 494 | <i>delacouri</i> | Kaeng Krachan National Park, Thailand          | 12.8847      | 99.6302   | Tropical and Subtropical Moist Broadleaf Forests             | Kayah-Karen/Tenasserim moist forests              | Photograph | All      | no data | Bruce Kekule                           |
| Non-melanistic 495 | <i>delacouri</i> | Kaeng Krachan National Park, Thailand          | 12.0023      | 99.6938   | Tropical and Subtropical Moist Broadleaf Forests             | Kayah-Karen/Tenasserim moist forests              | Photograph | All      | no data | Bruce Kekule                           |
| Non-melanistic 496 | <i>delacouri</i> | Kaeng Krachan National Park, Thailand          | 12.9500      | 99.2334   | Tropical and Subtropical Moist Broadleaf Forests             | Kayah-Karen/Tenasserim moist forests              | Photograph | All      | no data | Bruce Kekule                           |
| Non-melanistic 497 | <i>delacouri</i> | Kaeng Krachan National Park, Thailand          | 12.9500      | 99.2334   | Tropical and Subtropical Moist Broadleaf Forests             | Kayah-Karen/Tenasserim moist forests              | Photograph | All      | 2009    | Bruce Kekule                           |
| Non-melanistic 498 | <i>delacouri</i> | Kaeng Krachan National Park, Thailand          | 13.0527      | 99.1907   | Tropical and Subtropical Moist Broadleaf Forests             | Kayah-Karen/Tenasserim moist forests              | Photograph | All      | 2009    | Bruce Kekule                           |
| Non-melanistic 499 | <i>delacouri</i> | Kaeng Krachan National Park, Thailand          | 12.9500      | 99.2334   | Tropical and Subtropical Moist Broadleaf Forests             | Kayah-Karen/Tenasserim moist forests              | Photograph | All      | no data | Bruce Kekule                           |
| Non-melanistic 500 | <i>delacouri</i> | Kaeng Krachan National Park, Thailand          | 13.3983      | 99.5686   | Tropical and Subtropical Moist Broadleaf Forests             | Kayah-Karen/Tenasserim moist forests              | Photograph | All      | 2012    | Bruce Kekule                           |
| Non-melanistic 501 | <i>delacouri</i> | Kanchanaburi, Thailand                         | 14.0507      | 99.5436   | Tropical and Subtropical Moist Broadleaf Forests             | Kayah-Karen/Tenasserim moist forests              | Photograph | All      | no data | Allwen Jesudasan                       |
| Non-melanistic 502 | <i>delacouri</i> | Malay Peninsula, Thailand                      | 13.1955      | 99.2677   | Tropical and Subtropical Moist Broadleaf Forests             | Kayah-Karen/Tenasserim moist forests              | Photograph | All      | 2009    | Kae Kawanishi                          |
| Non-melanistic 503 | <i>delacouri</i> | Malay Peninsula, Thailand                      | 12.9322      | 99.3147   | Tropical and Subtropical Moist Broadleaf Forests             | Kayah-Karen/Tenasserim moist forests              | Photograph | All      | 2009    | Kae Kawanishi                          |
| Non-melanistic 504 | <i>saxicolor</i> | Sukavusumu, Yusufeli County, Turkey            | 41.3611      | 42.1203   | Temperate Broadleaf and Mixed Forests                        | Caucasus mixed forests                            | Photograph | All      | 1999    | Igor Khorozi                           |
| Non-melanistic 505 | <i>pardus</i>    | Masindi, Uganda                                | 1.7148       | 31.6919   | Tropical and Subtropical Grasslands, Savannas and Shrublands | Victoria Basin forest-savanna mosaic              | Photograph | All      | 1920    | National Museum of Natural History USA |
| Non-melanistic 506 | <i>pardus</i>    | Murchison Falls National Park, Uganda          | 2.1606       | 31.5837   | Tropical and Subtropical Grasslands, Savannas and Shrublands | Victoria Basin forest-savanna mosaic              | Photograph | All      | no data | Smithsonian Institution                |
| Non-melanistic 507 | <i>pardus</i>    | Queen Elizabeth National Park, Uganda          | -0.2880      | 29.9489   | Tropical and Subtropical Grasslands, Savannas and Shrublands | Victoria Basin forest-savanna mosaic              | Photograph | All      | no data | Smithsonian Institution                |
| Non-melanistic 508 | <i>delacouri</i> | Plateau Du Kontum, Gia Lai-Kon Tum, Vietnam    | 13.9174      | 108.1171  | Tropical and Subtropical Dry Broadleaf Forests               | Indochina dry forests                             | Photograph | All      | 1963    | National Museum of Natural History USA |
| Non-melanistic 509 | <i>nimr</i>      | Hawf Protected Area, Yemen                     | 16.6663      | 44.4431   | Deserts and Xeric Shrublands                                 | Arabian Highlands woodlands and shrublands        | Photograph | All      | no data | David Stanton                          |
| Non-melanistic 510 | <i>nimr</i>      | Hawf Protected Area, Yemen                     | 16.2698      | 43.2391   | Deserts and Xeric Shrublands                                 | Arabian Highlands woodlands and shrublands        | Photograph | All      | 2011    | David Stanton                          |
| Non-melanistic 511 | <i>nimr</i>      | Hawf Protected Area, Yemen                     | 16.7597      | 44.1937   | Deserts and Xeric Shrublands                                 | Arabian Highlands woodlands and shrublands        | Photograph | All      | 2011    | David Stanton                          |
| Non-melanistic 512 | <i>nimr</i>      | Wada'i, Yemen                                  | 16.0167      | 43.8932   | Deserts and Xeric Shrublands                                 | Arabian Highlands woodlands and shrublands        | Photograph | All      | no data | Jane Budd                              |
| Non-melanistic 513 | <i>nimr</i>      | Wada'i Boundaries, Yemen                       | 15.8774      | 43.6560   | Deserts and Xeric Shrublands                                 | Arabian Highlands woodlands and shrublands        | Photograph | All      | 2002    | Jane Budd                              |
| Non-melanistic 514 | <i>pardus</i>    | Akenge, Congo                                  | -4.8484      | 21.9107   | Tropical and Subtropical Grasslands, Savannas and Shrublands | Southern Congolian forest-savanna mosaic          | Photograph | All      | 1913    | American Museum of Natural History USA |
| Non-melanistic 515 | <i>pardus</i>    | Akenge, Congo                                  | -4.6869      | 21.9299   | Tropical and Subtropical Grasslands, Savannas and Shrublands | Southern Congolian forest-savanna mosaic          | Photograph | All      | 1913    | American Museum of Natural History USA |
| Non-melanistic 516 | <i>pardus</i>    | Bafuka, Haut, Congo                            | 3.7467       | 28.6836   | Tropical and Subtropical Grasslands, Savannas and Shrublands | Northern Congolian forest-savanna mosaic          | Photograph | All      | 1911    | American Museum of Natural History USA |
| Non-melanistic 517 | <i>pardus</i>    | Faradje, Haut, Congo                           | 3.7022       | 29.7332   | Tropical and Subtropical Grasslands, Savannas and Shrublands | Northern Congolian forest-savanna mosaic          | Photograph | All      | 1911    | American Museum of Natural History USA |
| Non-melanistic 518 | <i>pardus</i>    | Faradje, Haut, Congo                           | 3.7022       | 29.7332   | Tropical and Subtropical Grasslands, Savannas and Shrublands | Northern Congolian forest-savanna mosaic          | Photograph | All      | 1911    | American Museum of Natural History USA |
| Non-melanistic 519 | <i>pardus</i>    | Faradje, Haut, Congo                           | 3.9682       | 29.6295   | Tropical and Subtropical Grasslands, Savannas and Shrublands | Northern Congolian forest-savanna mosaic          | Photograph | All      | 1911    | American Museum of Natural History USA |
| Non-melanistic 520 | <i>pardus</i>    | Faradje, Haut, Congo                           | 3.8220       | 29.5090   | Tropical and Subtropical Grasslands, Savannas and Shrublands | Northern Congolian forest-savanna mosaic          | Photograph | All      | 1911    | American Museum of Natural History USA |
| Non-melanistic 521 | <i>pardus</i>    | Faradje, Haut, Congo                           | 3.8220       | 29.5090   | Tropical and Subtropical Grasslands, Savannas and Shrublands | Northern Congolian forest-savanna mosaic          | Photograph | All      | 1911    | American Museum of Natural History USA |
| Non-melanistic 522 | <i>pardus</i>    | Faradje, Haut, Congo                           | 3.8220       | 29.5090   | Tropical and Subtropical Grasslands, Savannas and Shrublands | Northern Congolian forest-savanna mosaic          | Photograph | All      | 1911    | American Museum of Natural History USA |
| Non-melanistic 523 | <i>pardus</i>    | Faradje, Haut, Congo                           | 3.8032       | 29.9086   | Tropical and Subtropical Grasslands, Savannas and Shrublands | Northern Congolian forest-savanna mosaic          | Photograph | All      | 1911    | American Museum of Natural History USA |
| Non-melanistic 524 | <i>pardus</i>    | Faradje, Haut, Congo                           | 3.7623       | 29.9336   | Tropical and Subtropical Grasslands, Savannas and Shrublands | Northern Congolian forest-savanna mosaic          | Photograph | All      | 1911    | American Museum of Natural History USA |
| Non-melanistic 525 | <i>pardus</i>    | Faradje, Haut, Congo                           | 3.6523       | 29.8528   | Tropical and Subtropical Grasslands, Savannas and Shrublands | Northern Congolian forest-savanna mosaic          | Photograph | All      | 1911    | American Museum of Natural History USA |
| Non-melanistic 526 | <i>pardus</i>    | Faradje, Haut, Congo                           | 3.6523       | 29.8528   | Tropical and Subtropical Grasslands, Savannas and Shrublands | Northern Congolian forest-savanna mosaic          | Photograph | All      | 1911    | American Museum of Natural History USA |
| Non-melanistic 527 | <i>pardus</i>    | Faradje, Haut, Congo                           | 3.8000       | 29.6956   | Tropical and Subtropical Grasslands, Savannas and Shrublands | Northern Congolian forest-savanna mosaic          | Photograph | All      | 1911    | American Museum of Natural History USA |
| Non-melanistic 528 | <i>pardus</i>    | Faradje, Haut, Congo                           | 3.6790       | 29.6251   | Tropical and Subtropical Grasslands, Savannas and Shrublands | Northern Congolian forest-savanna mosaic          | Photograph | All      | 1911    | American Museum of Natural History USA |
| Non-melanistic 529 | <i>pardus</i>    | Faradje, Haut, Congo                           | 3.6790       | 29.6251   | Tropical and Subtropical Grasslands, Savannas and Shrublands | Northern Congolian forest-savanna mosaic          | Photograph | All      | 1911    | American Museum of Natural History USA |
| Non-melanistic 530 | <i>pardus</i>    | Faradje, Haut, Congo                           | 3.6271       | 29.6647   | Tropical and Subtropical Grasslands, Savannas and Shrublands | Northern Congolian forest-savanna mosaic          | Photograph | All      | 1911    | American Museum of Natural History USA |
| Non-melanistic 531 | <i>pardus</i>    | Faradje, Haut, Congo                           | 3.6271       | 29.6647   | Tropical and Subtropical Grasslands, Savannas and Shrublands | Northern Congolian forest-savanna mosaic          | Photograph | All      | 1911    | American Museum of Natural History USA |
| Non-melanistic 532 | <i>pardus</i>    | Faradje, Haut, Congo                           | 3.6271       | 29.6647   | Tropical and Subtropical Grasslands, Savannas and Shrublands | Northern Congolian forest-savanna mosaic          | Photograph | All      | 1911    | American Museum of Natural History USA |
| Non-melanistic 533 | <i>pardus</i>    | Gamangui, Congo                                | 3.6631       | 27.3678   | Tropical and Subtropical Grasslands, Savannas and Shrublands | Northern Congolian forest-savanna mosaic          | Photograph | All      | 1913    | American Museum of Natural History USA |
| Non-melanistic 534 | <i>pardus</i>    | Madge, Congo                                   | 3.5396       | 27.0286   | Tropical and Subtropical Grasslands, Savannas and Shrublands | Northern Congolian forest-savanna mosaic          | Photograph | All      | 1914    | American Museum of Natural History USA |
| Non-melanistic 535 | <i>pardus</i>    | Niapu, Congo                                   | 2.4361       | 26.4438   | Tropical and Subtropical Moist Broadleaf Forests             | Northeastern Congo Basin moist forests            | Photograph | All      | 1913    | American Museum of Natural History USA |
| Non-melanistic 536 | <i>pardus</i>    | Niapu, Congo                                   | 2.3027       | 26.4826   | Tropical and Subtropical Moist Broadleaf Forests             | Northeastern Congo Basin moist forests            | Photograph | All      | 1913    | American Museum of Natural History USA |
| Non-melanistic 537 | <i>pardus</i>    | Niapu, Congo                                   | 2.3001       | 26.2433   | Tropical and Subtropical Moist Broadleaf Forests             | Northeastern Congo Basin moist forests            | Photograph | All      | 1913    | American Museum of Natural History USA |
| Non-melanistic 538 | <i>pardus</i>    | Niapu, Congo                                   | 2.4914       | 26.3490   | Tropical and Subtropical Moist Broadleaf Forests             | Northeastern Congo Basin moist forests            | Photograph | All      | 1913    | American Museum of Natural History USA |
| Non-melanistic 539 | <i>pardus</i>    | Poko, Garamba, Congo                           | 3.1303       | 26.9121   | Tropical and Subtropical Grasslands, Savannas and Shrublands | Northern Congolian forest-savanna mosaic          | Photograph | All      | 1913    | American Museum of Natural History USA |
| Non-melanistic 540 | <i>pardus</i>    | Vankerkhovenville, Haut, Congo                 | 3.0746       | 30.3358   | Tropical and Subtropical Grasslands, Savannas and Shrublands | Northern Congolian forest-savanna mosaic          | Photograph | All      | 1911    | American Museum of Natural History USA |
| Non-melanistic 541 | <i>pardus</i>    | Chobe National Park, Zambia                    | -17.6599     | 25.2459   | Tropical and Subtropical Grasslands, Savannas and Shrublands | Southern Miombo woodlands                         | Photograph | All      | no data | Chobe Safari Lodge                     |
| Non-melanistic 542 | <i>pardus</i>    | Luangwa, Zambia                                | -15.6191     | 30.2616   | Tropical and Subtropical Grasslands, Savannas and Shrublands | Zambeian and Mopane woodlands                     | Photograph | All      | no data | Project Luangwa                        |

| Id                 | Subspecies        | Location                               | Deg. - WGS84 |           | Biome                                                        | Ecoregion                         | Sample     | Analysis | Year    | Source                                 |
|--------------------|-------------------|----------------------------------------|--------------|-----------|--------------------------------------------------------------|-----------------------------------|------------|----------|---------|----------------------------------------|
|                    |                   |                                        | Latitude     | Longitude |                                                              |                                   |            |          |         |                                        |
| Non-melanistic 543 | <i>pardus</i>     | Luangwa, Zambia                        | -15.5797     | 30.3073   | Tropical and Subtropical Grasslands, Savannas and Shrublands | Zambeian and Mopane woodlands     | Photograph | All      | no data | Project Luangwa                        |
| Non-melanistic 544 | <i>pardus</i>     | Luangwa, Zambia                        | -15.4602     | 30.2923   | Tropical and Subtropical Grasslands, Savannas and Shrublands | Zambeian and Mopane woodlands     | Photograph | All      | no data | Project Luangwa                        |
| Non-melanistic 545 | <i>pardus</i>     | Luangwa, Zambia                        | -15.4425     | 30.1700   | Tropical and Subtropical Grasslands, Savannas and Shrublands | Zambeian and Mopane woodlands     | Photograph | All      | no data | Project Luangwa                        |
| Non-melanistic 546 | <i>pardus</i>     | South Luangwa National Park, Zambia    | -12.5524     | 31.7476   | Tropical and Subtropical Grasslands, Savannas and Shrublands | Zambeian and Mopane woodlands     | Photograph | All      | no data | Bushcamp Project                       |
| Non-melanistic 547 | <i>pardus</i>     | South Luangwa National Park, Zambia    | -12.6344     | 31.7317   | Tropical and Subtropical Grasslands, Savannas and Shrublands | Zambeian and Mopane woodlands     | Photograph | All      | no data | Andrew Stein                           |
| Non-melanistic 548 | <i>pardus</i>     | Mashonaland, Zimbabwe                  | -16.5912     | 31.0548   | Tropical and Subtropical Grasslands, Savannas and Shrublands | Southern Miombo woodlands         | Photograph | All      | 1892    | National Museum of Natural History USA |
| Non-melanistic 549 | <i>pardus</i>     | Ruaha National Park, Tanzania          | -7.5826      | 34.3244   | Tropical and Subtropical Grasslands, Savannas and Shrublands | Central Zambeian Miombo woodlands | Photograph | All      | 2012    | WildCru                                |
| Non-melanistic 550 | <i>pardus</i>     | Welgevonden Game Reserve, South Africa | -24.3418     | 28.0210   | Tropical and Subtropical Grasslands, Savannas and Shrublands | Southern Africa bushveld          | Photograph | All      | 2011    | Panthera                               |
| Non-melanistic 551 | <i>pardus</i>     | Welgevonden Game Reserve, South Africa | -24.3418     | 28.0210   | Tropical and Subtropical Grasslands, Savannas and Shrublands | Southern Africa bushveld          | Photograph | All      | 2011    | Panthera                               |
| Non-melanistic 552 | <i>orientalis</i> | Wangqing, China                        | 43.0140      | 130.3603  | Temperate Broadleaf and Mixed Forests                        | Manchurian mixed forests          | Photograph | All      | 2010    | World Wild Fund                        |
