# Supplementary material for: Mapping black panthers: Macroecological modeling of melanism in leopards (Panthera pardus)
Source: PubMed Central journal article supplement (PMC5381760; doi:10.1371/journal.pone.0170378), 2017-04-05
Supplement: pone.0170378.s002.pdf [file pone.0170378.s002.pdf]

S2 Table - Environmental predictors used in the initial analysis and selected with Pearson's test (in red).

| Code         | Environmental predictor                               |
|--------------|-------------------------------------------------------|
| Land         | Landscape conformation (NDVI+GlobCover)               |
| <b>Alt</b>   | <b>Altitude</b>                                       |
| <b>Bio01</b> | <b>Annual mean temperature</b>                        |
| Bio02        | Mean diurnal temperature range (mean(period max-min)) |
| Bio03        | Isothermality (Bio02 ÷ Bio07)                         |
| Bio04        | Temperature seasonality                               |
| <b>Bio05</b> | <b>Max temperature of warmest week</b>                |
| <b>Bio06</b> | <b>Min temperature of coldest week</b>                |
| Bio07        | Temperature annual range (Bio05-Bio06)                |
| Bio08        | Mean temperature of wettest quarter                   |
| Bio09        | Mean temperature of driest quarter                    |
| Bio10        | Mean temperature of warmest quarter                   |
| Bio11        | Mean temperature of coldest quarter                   |
| <b>Bio12</b> | <b>Annual precipitation</b>                           |
| <b>Bio13</b> | <b>Precipitation of wettest week</b>                  |
| Bio14        | Precipitation of driest week                          |
| <b>Bio15</b> | <b>Precipitation seasonality</b>                      |
| Bio16        | Precipitation of wettest quarter                      |
| Bio17        | Precipitation of driest quarter                       |
| Bio18        | Precipitation of warmest quarter                      |
| Bio19        | Precipitation of coldest quarter                      |
| <b>Bio20</b> | <b>Annual mean radiation</b>                          |
| Bio21        | Highest weekly radiation                              |
| Bio22        | Lowest weekly radiation                               |
| <b>Bio23</b> | <b>Radiation seasonality</b>                          |
| Bio24        | Radiation of wettest quarter                          |
| Bio25        | Radiation of driest quarter                           |
| Bio26        | Radiation of warmest quarter                          |
| Bio27        | Radiation of coldest quarter                          |
| Bio28        | Annual mean moisture index                            |
| <b>Bio29</b> | <b>Highest weekly moisture index</b>                  |
| Bio30        | Lowest weekly moisture index                          |
| Bio31        | Moisture index seasonality                            |
| <b>Bio32</b> | <b>Mean moisture index of wettest quarter</b>         |
| <b>Bio33</b> | <b>Mean moisture index of driest quarter</b>          |
| Bio34        | Mean moisture index of warmest quarter                |
| Bio35        | Mean moisture index of coldest quarter                |
