# Supplementary material for: Mapping black panthers: Macroecological modeling of melanism in leopards (Panthera pardus)
Source: PubMed Central journal article supplement (PMC5381760; doi:10.1371/journal.pone.0170378), 2017-04-05

S3 Fig - Response curves observed in the Maxent analysis for each environmental predictor used to construct the melanistic model.

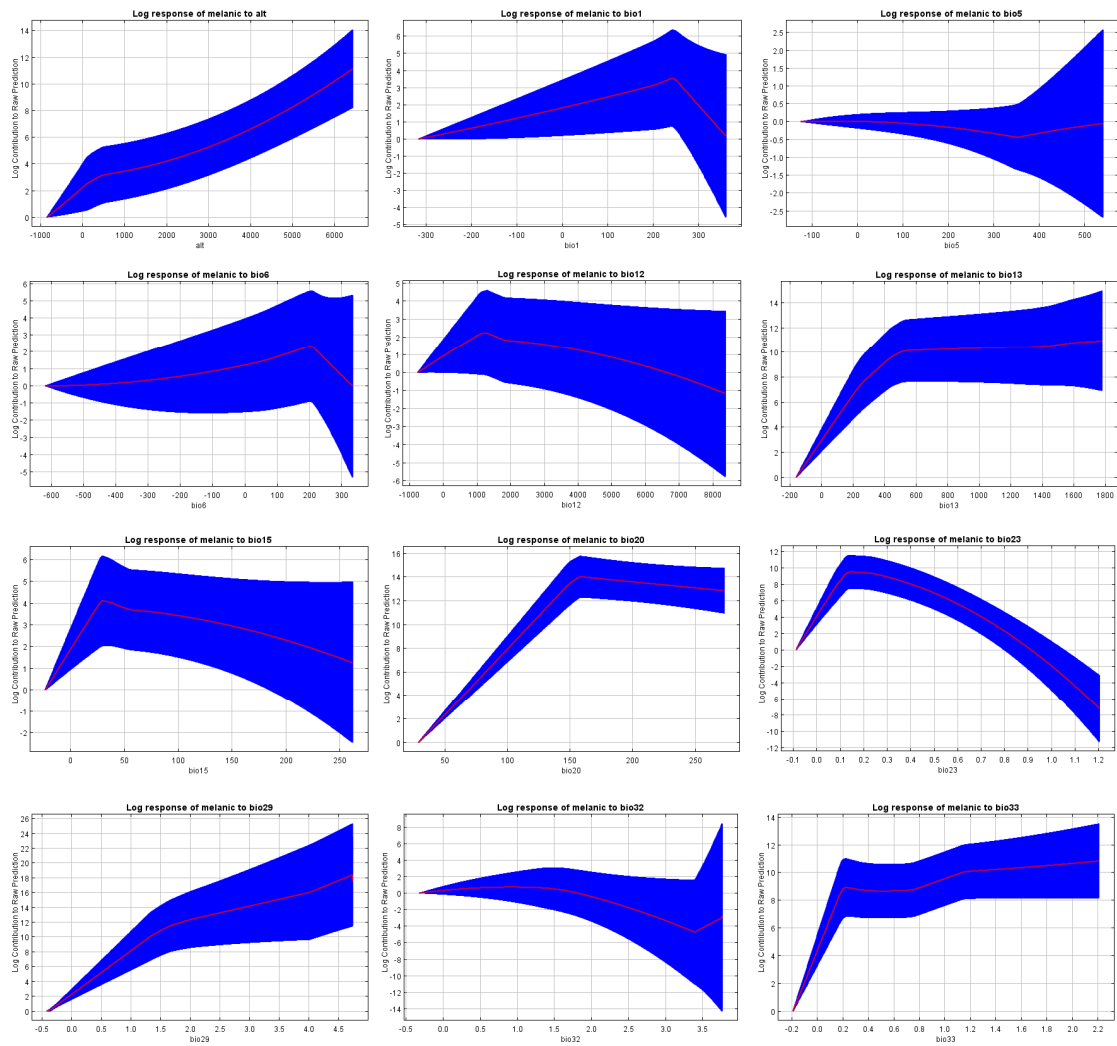

Supplement: pone.0170378.s005.pdf [file pone.0170378.s005.pdf]
