# Supplementary material for: Mapping black panthers: Macroecological modeling of melanism in leopards (Panthera pardus)
Source: PubMed Central journal article supplement (PMC5381760; doi:10.1371/journal.pone.0170378), 2017-04-05

S7 Fig – Graphs depicting the results of the suitability test comparing the melanistic and non-melanistic models across all the location records in our database ( $p < 0.001$ ). Mean suitability in the non-melanistic model = 0.594 (standard deviation=0.167); mean suitability in the melanistic model = 0.192 (standard deviation=0.280).

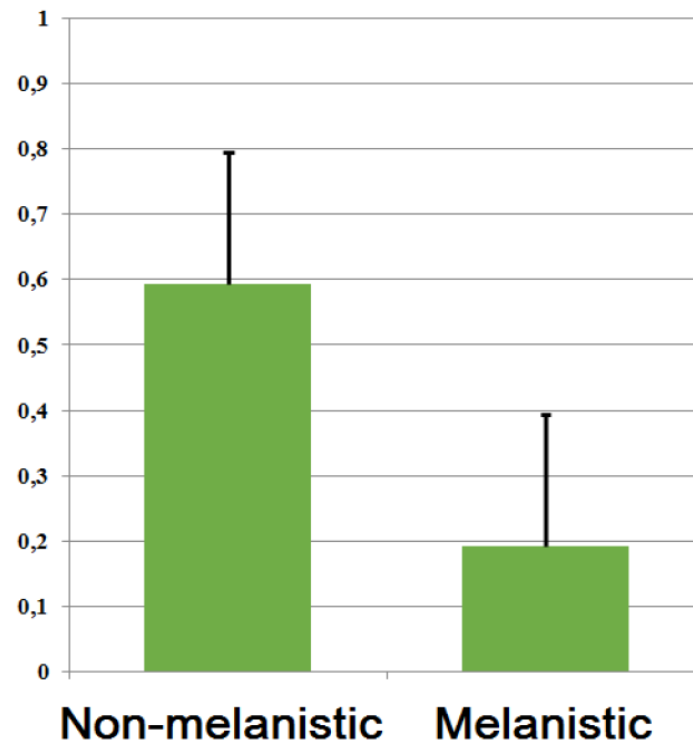

Supplement: pone.0170378.s009.pdf [file pone.0170378.s009.pdf]
